# Supplementary material for: Defining the Geographical Range of the Plasmodium knowlesi Reservoir
Source: PLoS Negl Trop Dis. 2014 Mar 27;8(3):e2780. doi: 10.1371/journal.pntd.0002780 (PMC3967999; doi:10.1371/journal.pntd.0002780)
Supplement: Table S1 — An Excel file containing the full set of individual scores for each evidence class and the overall evidence score as displayed in Figure 2A of the manuscript. (XLSX) [file pntd.0002780.s003.xlsx]

## Sheet: Sheet1
			P. knowlesi presence					Other human malaria presence/absence							Monkey host presence scores				M. fascicularis presence					M. nemestrina presence					M. leonina presence		Monkey host absence			Vectors												Dirus Complex presence
Subnational area	overall score	overall score class	score	diagnostic method	year of infection	host/vector	ref.	score	human malaria presence	source	falciparum presence	source	vivax presence	source	overall host score	fascicularis score	nemestrina score	leonina score	presence	source	intro. pop. score	year	source	presence	source	intro. pop. score	year	source	presence	source	score	combined presence	comb. pres. + buffer	vector score	Dirus score	leuc./latens score	balabacensis score	fluviatilis score	Minimus score	koliensis score	aconitus score	annularis score	Culicifacies score	flavirostris score	Other vectors of human malaria	presence	source	presence	source
Cambodia
Kampong Chhnang	6	3						0	1	[20]					3	3	0	2	1	[23]				0	[23]				1	[23]	0	1	1	3	3	0	0	0	2	0	2	2	0	0	0	1	[35]
Kampot	6	3						0	1	[20]					3	3	0	2	1	[23]				0	[23]				1	[23]	0	1	1	3	3	0	0	0	2	0	2	2	0	0	0	1	[35]
Kampong Speu	6	3						0	1	[20]					3	3	0	2	1	[23]				0	[23]				1	[23]	0	1	1	3	3	0	0	0	2	0	2	2	0	0	0	1	[35]
Kep	6	3						0	1	[20]					3	3	0	2	1	[23]				0	[23]				1	[23]	0	1	1	3	3	0	0	0	2	0	2	2	0	0	0	1	[35]
Stung Treng	6	3						0	1	[20]					3	3	0	2	1	[23]				0	[23]				1	[23]	0	1	1	3	3	0	0	0	2	0	2	2	2	0	0	1	[35]
Takeo	6	3						0	1	[20]					3	3	0	2	1	[23]				0	[23]				1	[23]	0	1	1	3	3	0	0	0	2	0	2	2	0	0	0	1	[35]
Kampong Thom	6	3						0	1	[20]					3	3	0	2	1	[23]				0	[23]				1	[23]	0	1	1	3	3	0	0	0	2	0	2	2	0	0	0	1	[35]
Sihanoukville	6	3						0	1	[20]					3	3	0	2	1	[23]				0	[23]				1	[23]	0	1	1	3	3	0	0	0	2	0	2	2	0	0	0	1	[35]
Prey Veng	6	3						0	1	[20]					3	3	0	2	1	[23]				0	[23]				1	[23]	0	1	1	3	3	0	0	0	2	0	2	2	0	0	0	1	[35]
Kandal	6	3						0	1	[20]					3	3	0	0	1	[23]				0	[23]				0	[23]	0	1	1	3	3	0	0	0	2	0	2	2	0	0	0	1	[35]
Phnom Penh	6	3						0	1	[20]					3	3	0	0	1	[23]				0	[23]				0	[23]	0	1	1	3	3	0	0	0	2	0	2	2	0	0	0	1	[35]
Koh Kong	6	3						0	1	[20]					3	3	0	2	1	[23]				0	[23]				1	[23]	0	1	1	3	3	0	0	0	2	0	2	2	0	0	0	1	[35]
Pursat	6	3						0	1	[20]					3	3	0	2	1	[23]				0	[23]				1	[23]	0	1	1	3	3	0	0	0	2	0	2	2	0	0	0	1	[35]
Ratanak Kiri	6	3						0	1	[20]					3	3	0	2	1	[23]				0	[23]				1	[23]	0	1	1	3	3	0	0	0	2	0	2	2	2	0	0	1	[35]
Preah Vihear	6	3						0	1	[20]					3	3	0	2	1	[23]				0	[23]				1	[23]	0	1	1	3	3	0	0	0	2	0	2	2	2	0	0	1	[35]
Battambang	6	3						0	1	[20]					3	3	0	2	1	[23]				0	[23]				1	[23]	0	1	1	3	3	0	0	0	2	0	2	2	0	0	0	1	[35]
Mondul Kiri	6	3						0	1	[20]					3	3	0	2	1	[23]				0	[23]				1	[23]	0	1	1	3	3	0	0	0	2	0	2	2	2	0	0	1	[35]
Pailin	9	4	9	Steenkeste PCR	2010	human	[1]	0	1	[20]					3	3	0	2	1	[23]				0	[23]				1	[23]	0	1	1	3	3	0	0	0	2	0	2	2	0	0	0	1	[35]
Oddar Meanchey	6	3						0	1	[20]					3	3	0	2	1	[23]				0	[23]				1	[23]	0	1	1	3	3	0	0	0	2	0	2	2	0	0	0	1	[35]
Kampong Cham	6	3						0	1	[20]					3	3	0	2	1	[23]				0	[23]				1	[23]	0	1	1	3	3	0	0	0	2	0	2	2	2	0	0	1	[35]
Banteay Meanchey	6	3						0	1	[20]					3	3	0	2	1	[23]				0	[23]				1	[23]	0	1	1	3	3	0	0	0	2	0	2	2	0	0	0	1	[35]
Siemreap	6	3						0	1	[20]					3	3	0	2	1	[23]				0	[23]				1	[23]	0	1	1	3	3	0	0	0	2	0	2	2	0	0	0	1	[35]
Svay Rieng	6	3						0	1	[20]					3	3	0	2	1	[23]				0	[23]				1	[23]	0	1	1	3	3	0	0	0	2	0	2	2	0	0	0	1	[35]
Kratie	6	3						0	1	[20]					3	3	0	2	1	[23]				0	[23]				1	[23]	0	1	1	3	3	0	0	0	2	0	2	2	2	0	0	1	[35]
Thailand
Nan	5	2						0	1	[20]					2	0	0	2	0	[23]				0	[23]				1	[23]	0	1	1	3	3	0	0	0	2	0	2	2	2	0	0	1	[35]
Krabi	6	3						0	1	[20]					3	3	3	0	1	[23]				1	[23]				0	[23]	0	1	1	3	3	3	0	0	2	0	2	2	0	0	0	1	[35]
Nakhon Sawan	6	3						0	1	[20]					3	3	3	2	1	[23]				0	[23]	3	2011	[14]	1	[23]	0	1	1	3	3	0	0	0	2	0	2	2	2	0	0	1	[35]
Samut Prakarn	6	3						0	1	[20]					3	3	0	0	1	[23]				0	[23]				0	[23]	0	1	1	3	3	0	0	0	2	0	2	2	0	0	0	1	[35]
Chiang Mai	5	2						0	1	[20]					2	0	0	2	0	[23]				0	[23]				1	[23]	0	1	1	3	3	0	0	0	2	0	2	2	2	0	0	1	[35]
Nong Bua Lamphu	2	2						-3	0	[20]					2	0	0	2	0	[23]				0	[23]				1	[23]	0	1	1	3	3	0	0	0	2	0	2	2	2	0	0	1	[35]
Lampang	6	3						0	1	[20]					3	3	0	2	1	[23]				0	[23]				1	[23]	0	1	1	3	3	0	0	0	2	0	2	2	2	0	0	1	[35]
Chaiyaphum	6	3						0	1	[20]					3	3	0	2	1	[23]				0	[23]				1	[23]	0	1	1	3	3	0	0	0	2	0	2	2	0	0	0	1	[35]
Suphanburi	6	3						0	1	[20]					3	3	0	2	1	[23]				0	[23]				1	[23]	0	1	1	3	3	0	0	0	2	0	2	2	2	0	0	1	[35]
Singburi	6	3						0	1	[20]					3	3	0	0	1	[23]				0	[23]				0	[23]	0	1	1	3	3	0	0	0	2	0	2	2	0	0	0	1	[35]
Sa Kaeo	6	3						0	1	[20]					3	3	0	2	1	[23]				0	[23]				1	[23]	0	1	1	3	3	0	0	0	2	0	2	2	0	0	0	1	[35]
Chiang Rai	5	2						0	1	[20]					2	0	0	2	0	[23]				0	[23]				1	[23]	0	1	1	3	3	0	0	0	2	0	2	2	2	0	0	1	[35]
Phetchaburi	6	3						0	1	[20]					3	3	0	2	1	[23]				0	[23]				1	[23]	0	1	1	3	3	0	0	0	2	0	2	2	2	0	0	1	[35]
Kalasin	3	2						-3	0	[20]					3	3	0	0	1	[23]				0	[23]				0	[23]	0	1	1	3	3	0	0	0	2	0	2	2	2	0	0	1	[35]
Loei	3	2						-3	0	[20]					3	3	0	2	1	[23]				0	[23]				1	[23]	0	1	1	3	3	0	0	0	2	0	2	2	2	0	0	1	[35]
Nakhon Nayok	6	3						0	1	[20]					3	3	0	2	1	[23]				0	[23]				1	[23]	0	1	1	3	3	0	0	0	2	0	2	2	0	0	0	1	[35]
Tak	9	4	9	microscopy & Putaporntip PCR & sequenced complete msp1 gene	2009	human	[2]	0	1	[20]					3	3	0	2	1	[23]				0	[23]				1	[23]	0	1	1	3	3	0	0	0	2	0	2	2	2	0	0	1	[35]
Mae Hong Son	5	2						0	1	[20]					2	0	0	2	0	[23]				0	[23]				1	[23]	0	1	1	3	3	0	0	0	2	0	2	2	2	0	0	1	[35]
Pattani	6	3						0	1	[20]					3	3	3	0	1	[23]				1	[23]				0	[23]	0	1	1	3	3	3	0	0	2	0	2	2	0	0	0	1	[35]
Khon Kaen	3	2						-3	0	[20]					3	3	0	2	1	[23]				0	[23]				1	[23]	0	1	1	3	3	0	0	0	2	0	2	2	2	0	0	1	[35]
Phatthalung	6	3						0	1	[20]					3	3	3	0	1	[23]				1	[23]				0	[23]	0	1	1	3	3	3	0	0	2	0	2	2	0	0	0	1	[35]
Phuket	6	3						0	1	[20]					3	3	3	0	0	[23]	3	2005	[14]	1	[23]				0	[23]	0	1	1	3	3	3	0	0	2	0	2	2	0	0	0	1	[35]
Phitsanulok	6	3						0	1	[20]					3	3	0	2	1	[23]				0	[23]				1	[23]	0	1	1	3	3	0	0	0	2	0	2	2	2	0	0	1	[35]
Bangkok	6	3						0	1	[20]					3	3	0	0	1	[23]				0	[23]				0	[23]	0	1	1	3	3	0	0	0	2	0	2	2	0	0	0	1	[35]
Nakhon Si Thammarat	6	3						0	1	[20]					3	3	3	0	1	[23]				1	[23]				0	[23]	0	1	1	3	3	3	0	0	2	0	2	2	0	0	0	1	[35]
Mukdahan	6	3						0	1	[20]					3	3	0	2	1	[23]				0	[23]				1	[23]	0	1	1	3	3	0	0	0	2	0	2	2	2	0	0	1	[35]
Ranong	9	4	9	microscopy & RDT & sequenced fragment of cytb gene	2010	human	[3]	0	1	[20]					3	3	3	2	1	[23]				1	[23]				1	[23]	0	1	1	3	3	3	0	0	2	0	2	2	0	0	0	1	[35]
Roi Et	3	2						-3	0	[20]					3	3	0	0	1	[23]				0	[23]				0	[23]	0	1	1	3	3	0	0	0	2	0	2	2	2	0	0	1	[35]
Trad	6	3						0	1	[20]					3	3	0	2	1	[23]				0	[23]				1	[23]	0	1	1	3	3	0	0	0	2	0	2	2	0	0	0	1	[35]
Pathum Thani	6	3						0	1	[20]					3	3	0	0	1	[23]				0	[23]				0	[23]	0	1	1	3	3	0	0	0	2	0	2	2	0	0	0	1	[35]
Phichit	6	3						0	1	[20]					3	3	0	0	1	[23]				0	[23]				0	[23]	0	1	1	3	3	0	0	0	2	0	2	2	0	0	0	1	[35]
Ratchaburi	6	3						0	1	[20]					3	3	0	2	1	[23]				0	[23]				1	[23]	0	1	1	3	3	0	0	0	2	0	2	2	2	0	0	1	[35]
Amnat Charoen	3	2						-3	0	[20]					3	3	0	2	1	[23]				0	[23]				1	[23]	0	1	1	3	3	0	0	0	2	0	2	2	2	0	0	1	[35]
Lopburi	6	3						0	1	[20]					3	3	3	2	1	[23]				0	[23]	3	2011	[14]	1	[23]	0	1	1	3	3	0	0	0	2	0	2	2	0	0	0	1	[35]
Kanchanaburi	6	3						0	1	[20]					3	3	0	2	1	[23]				0	[23]				1	[23]	0	1	1	3	3	0	0	0	2	0	2	2	2	0	0	1	[35]
Surin	6	3						0	1	[20]					3	3	0	2	1	[23]				0	[23]				1	[23]	0	1	1	3	3	0	0	0	2	0	2	2	0	0	0	1	[35]
Yala	9	4	9	microscopy& Putaporntip PCR & sequenced complete msp1 gene	2009	human	[2]	0	1	[20]					3	3	3	0	1	[23]				1	[23]				0	[23]	0	1	1	3	3	3	0	0	2	0	2	2	0	0	0	1	[35]
Satun	6	3						0	1	[20]					3	3	3	0	1	[23]				1	[23]				0	[23]	0	1	1	3	3	3	0	0	2	0	2	2	0	0	0	1	[35]
Samut Sakhon	6	3						0	1	[20]					3	3	0	0	1	[23]				0	[23]				0	[23]	0	1	1	3	3	0	0	0	2	0	2	2	0	0	0	1	[35]
Kampaeng Phet	6	3						0	1	[20]					3	3	0	2	1	[23]				0	[23]				1	[23]	0	1	1	3	3	0	0	0	2	0	2	2	2	0	0	1	[35]
Chonburi	6	3						0	1	[20]					3	3	3	2	1	[23]				0	[23]	3	2011	[14]	1	[23]	0	1	1	3	3	0	0	0	2	0	2	2	0	0	0	1	[35]
Songkhla	6	3						0	1	[20]					3	3	3	0	1	[23]				1	[23]				0	[23]	0	1	1	3	3	3	0	0	2	0	2	2	0	0	0	1	[35]
Ang Thong	6	3						0	1	[20]					3	3	0	0	1	[23]				0	[23]				0	[23]	0	1	1	3	3	0	0	0	2	0	2	2	0	0	0	1	[35]
Surat Thani	6	3						0	1	[20]					3	3	3	0	1	[23]				1	[23]				0	[23]	0	1	1	3	3	3	0	0	2	0	2	2	0	0	0	1	[35]
Phangnga	6	3						0	1	[20]					3	3	3	0	1	[23]				1	[23]				0	[23]	0	1	1	3	3	3	0	0	2	0	2	2	0	0	0	1	[35]
Nong Khai	2	2						-3	0	[20]					2	0	0	2	0	[23]				0	[23]				1	[23]	0	1	1	3	3	0	0	0	2	0	2	2	2	0	0	1	[35]
Si Saket	6	3						0	1	[20]					3	3	0	2	1	[23]				0	[23]				1	[23]	0	1	1	3	3	0	0	0	2	0	2	2	2	0	0	1	[35]
Prachuap Khilikhan	9	4	9	microscopy & Kawamoto PCR & sequenced SSU rRNA gene	2000	human	[4]	0	1	[20]					3	3	0	2	1	[23]				0	[23]				1	[23]	0	1	1	3	3	0	0	0	2	0	2	2	2	0	0	1	[35]
Uthai Thani	6	3						0	1	[20]					3	3	0	2	1	[23]				0	[23]				1	[23]	0	1	1	3	3	0	0	0	2	0	2	2	2	0	0	1	[35]
Nonthaburi	6	3						0	1	[20]					3	3	0	0	1	[23]				0	[23]				0	[23]	0	1	1	3	3	0	0	0	2	0	2	2	0	0	0	1	[35]
Udon Thani	3	2						-3	0	[20]					3	3	3	0	0	[23]	3	2003	[14]	0	[23]	3	2011	[14]	0	[23]	0	0	1	3	3	0	0	0	2	0	2	2	2	0	0	1	[35]
Rayong	6	3						0	1	[20]					3	3	0	2	1	[23]				0	[23]				1	[23]	0	1	1	3	3	0	0	0	2	0	2	2	0	0	0	1	[35]
Trang	6	3						0	1	[20]					3	3	3	0	1	[23]				1	[23]				0	[23]	0	1	1	3	3	3	0	0	2	0	2	2	0	0	0	1	[35]
Ubon Ratchathani	6	3						0	1	[20]					3	3	0	2	1	[23]				0	[23]				1	[23]	0	1	1	3	3	0	0	0	2	0	2	2	2	0	0	1	[35]
Sukhothai	6	3						0	1	[20]					3	3	0	2	1	[23]				0	[23]				1	[23]	0	1	1	3	3	0	0	0	2	0	2	2	0	0	0	1	[35]
Maha Sarakham	3	2						-3	0	[20]					3	3	0	0	1	[23]				0	[23]				0	[23]	0	1	1	3	3	0	0	0	2	0	2	2	2	0	0	1	[35]
Phrae	5	2						0	1	[20]					2	0	0	2	0	[23]				0	[23]				1	[23]	0	1	1	3	3	0	0	0	2	0	2	2	2	0	0	1	[35]
Buriram	6	3						0	1	[20]					3	3	0	2	1	[23]				0	[23]				1	[23]	0	1	1	3	3	0	0	0	2	0	2	2	0	0	0	1	[35]
Chainat	6	3						0	1	[20]					3	3	0	0	1	[23]				0	[23]				0	[23]	0	1	1	3	3	0	0	0	2	0	2	2	0	0	0	1	[35]
Nakhon Phanom	3	2						-3	0	[20]					3	3	0	2	1	[23]				0	[23]				1	[23]	0	1	1	3	3	0	0	0	2	0	2	2	2	0	0	1	[35]
Saraburi	6	3						0	1	[20]					3	3	0	2	1	[23]				0	[23]				1	[23]	0	1	1	3	3	0	0	0	2	0	2	2	0	0	0	1	[35]
Chachoengsao	6	3						0	1	[20]					3	3	0	2	1	[23]				0	[23]				1	[23]	0	1	1	3	3	0	0	0	2	0	2	2	0	0	0	1	[35]
Yasothon	6	3						0	1	[20]					3	3	0	0	1	[23]				0	[23]				0	[23]	0	1	1	3	3	0	0	0	2	0	2	2	2	0	0	1	[35]
Nakhon Pathom	6	3						0	1	[20]					3	3	0	0	1	[23]				0	[23]				0	[23]	0	1	1	3	3	0	0	0	2	0	2	2	0	0	0	1	[35]
Phayao	5	2						0	1	[20]					2	0	0	2	0	[23]				0	[23]				1	[23]	0	1	1	3	3	0	0	0	2	0	2	2	2	0	0	1	[35]
Nakhon Ratchasima	6	3						0	1	[20]					3	3	0	2	1	[23]				0	[23]				1	[23]	0	1	1	3	3	0	0	0	2	0	2	2	0	0	0	1	[35]
Uttaradit	6	3						0	1	[20]					3	3	0	2	1	[23]				0	[23]				1	[23]	0	1	1	3	3	0	0	0	2	0	2	2	2	0	0	1	[35]
Samut Songkham	6	3						0	1	[20]					3	3	0	0	1	[23]				0	[23]				0	[23]	0	1	1	3	3	0	0	0	2	0	2	2	2	0	0	1	[35]
Chanthaburi	9	4	9	microscopy& Putaporntip PCR & sequenced complete msp1 gene	2009	human	[2]	0	1	[20]					3	3	0	2	1	[23]				0	[23]				1	[23]	0	1	1	3	3	0	0	0	2	0	2	2	0	0	0	1	[35]
Chumphon	6	3						0	1	[20]					3	3	3	2	1	[23]				1	[23]				1	[23]	0	1	1	3	3	3	0	0	2	0	2	2	0	0	0	1	[35]
Narathiwat	9	4	9	microscopy& Putaporntip PCR & sequenced complete msp1 gene	2009	human	[2]	0	1	[20]					3	3	3	0	1	[23]				1	[23]				0	[23]	0	1	1	3	3	3	0	0	2	0	2	2	0	0	0	1	[35]
Phra Nakhon Si Ayudhya	6	3						0	1	[20]					3	3	0	0	1	[23]				0	[23]				0	[23]	0	1	1	3	3	0	0	0	2	0	2	2	0	0	0	1	[35]
Phetchabun	6	3						0	1	[20]					3	3	0	2	1	[23]				0	[23]				1	[23]	0	1	1	3	3	0	0	0	2	0	2	2	0	0	0	1	[35]
Phachinburi	6	3						0	1	[20]					3	3	0	2	1	[23]				0	[23]				1	[23]	0	1	1	3	3	0	0	0	2	0	2	2	0	0	0	1	[35]
Lamphun	5	2						0	1	[20]					2	0	0	2	0	[23]				0	[23]				1	[23]	0	1	1	3	3	0	0	0	2	0	2	2	2	0	0	1	[35]
Sakon Nakhon	-1	1						-3	0	[20]					0	0	0	0	0	[23]				0	[23]				0	[23]	-1	0	1	3	3	0	0	0	2	0	2	2	2	0	0	1	[35]
Myanmar
Bago East Division	6	3						0	1	[20]					3	3	0	2	1	[23]				0	[23]				1	[23]	0	1	1	3	3	0	0	0	2	0	2	2	2	0	0	1	[35]
Shan State (North & East)	9	4	9	microscopy & Singh PCR & sequenced PCR fragment	2008	human	[5]	0	1	[20]					2	0	0	2	0	[23]				0	[23]				1	[23]	0	1	1	3	3	0	0	0	2	0	2	2	2	0	0	1	[35]
Kayin State	6	3						0	1	[20]					3	3	0	2	1	[23]				0	[23]				1	[23]	0	1	1	3	3	0	0	0	2	0	2	2	2	0	0	1	[35]
Magway Division	6	3						0	1	[20]					3	3	0	2	1	[23]				0	[23]				1	[23]	0	1	1	3	3	0	0	0	2	0	2	2	2	0	0	1	[35]
Mon State	6	3						0	1	[20]					3	3	0	2	1	[23]				0	[23]				1	[23]	0	1	1	3	3	0	0	0	2	0	2	2	2	0	0	1	[35]
Kachin State	5	2						0	1	[20]					2	0	0	2	0	[23]				0	[23]				1	[23]	0	1	1	3	3	0	0	0	2	0	2	2	2	0	0	1	[35]
Yangon Division	6	3						0	1	[20]					3	3	0	2	1	[23]				0	[23]				1	[23]	0	1	1	3	3	0	0	0	2	0	2	2	2	0	0	1	[35]
Bago West Division	6	3						0	1	[20]					3	3	0	2	1	[23]				0	[23]				1	[23]	0	1	1	3	3	0	0	0	2	0	2	2	2	0	0	1	[35]
Shan State (South)	5	2						0	1	[20]					2	0	0	2	0	[23]				0	[23]				1	[23]	0	1	1	3	3	0	0	0	2	0	2	2	2	0	0	1	[35]
Kayah State	5	2						0	1	[20]					2	0	0	2	0	[23]				0	[23]				1	[23]	0	1	1	3	3	0	0	0	2	0	2	2	2	0	0	1	[35]
Chin State	5	2						0	1	[20]					2	0	0	2	0	[23]				0	[23]				1	[23]	0	1	1	3	3	0	0	0	2	0	2	2	2	0	0	1	[35]
Sagaing Division	5	2						0	1	[20]					2	0	0	2	0	[23]				0	[23]				1	[23]	0	1	1	3	3	0	0	0	2	0	2	2	2	0	0	1	[35]
Mandalay Division	5	2						0	1	[20]					2	0	0	2	0	[23]				0	[23]				1	[23]	0	1	1	3	3	0	0	0	2	0	2	2	2	0	0	1	[35]
Ayeyarwady Division	6	3						0	1	[20]					3	3	0	2	1	[23]				0	[23]				1	[23]	0	1	1	3	3	0	0	0	2	0	2	2	2	0	0	1	[35]
Tanintharyi Division	9	4	9	microscopy & Singh PCR & sequenced csp fragment	2010	human	[6]	0	1	[20]					3	3	3	2	1	[23]				1	[23]				1	[23]	0	1	1	3	3	0	0	0	2	0	2	2	2	0	0	1	[35]
Rakhine State	6	3						0	1	[20]					3	3	0	2	1	[23]				0	[23]				1	[23]	0	1	1	3	3	0	0	0	2	0	2	2	2	0	0	1	[35]
Laos
Vientiane	5	2						0	1	[20]					2	0	0	2	0	[23]				0	[23]				1	[23]	0	1	1	3	3	0	0	0	2	0	2	2	2	0	0	1	[35]
Louang-Namtha	5	2						0	1	[20]					2	0	0	2	0	[23]				0	[23]				1	[23]	0	1	1	3	3	0	0	0	2	0	2	2	2	0	0	1	[35]
Bolikhamxai	5	2						0	1	[20]					2	0	0	2	0	[23]				0	[23]				1	[23]	0	1	1	3	3	0	0	0	2	0	2	2	2	0	0	1	[35]
Houaphan	1	2						-3	0	[20]					2	0	0	2	0	[23]				0	[23]				1	[23]	0	1	1	2	0	0	0	0	2	0	2	2	2	0	0	0	[35]
Champasak	6	3						0	1	[20]					3	3	0	2	1	[23]				0	[23]				1	[23]	0	1	1	3	3	0	0	0	2	0	2	2	2	0	0	1	[35]
Xekong	6	3						0	1	[20]					3	3	0	2	1	[23]				0	[23]				1	[23]	0	1	1	3	3	0	0	0	2	0	2	2	2	0	0	1	[35]
Xiangkhouang	5	2						0	1	[20]					2	0	0	2	0	[23]				0	[23]				1	[23]	0	1	1	3	3	0	0	0	2	0	2	2	2	0	0	1	[35]
Oudomxai	5	2						0	1	[20]					2	0	0	2	0	[23]				0	[23]				1	[23]	0	1	1	3	3	0	0	0	2	0	2	2	2	0	0	1	[35]
Khammouan	6	3						0	1	[20]					3	3	0	2	1	[23]				0	[23]				1	[23]	0	1	1	3	3	0	0	0	2	0	2	2	2	0	0	1	[35]
Salavan	6	3						0	1	[20]					3	3	0	2	1	[23]				0	[23]				1	[23]	0	1	1	3	3	0	0	0	2	0	2	2	2	0	0	1	[35]
Louangphabang	5	2						0	1	[20]					2	0	0	2	0	[23]				0	[23]				1	[23]	0	1	1	3	3	0	0	0	2	0	2	2	2	0	0	1	[35]
Attapu	6	3						0	1	[20]					3	3	0	2	1	[23]				0	[23]				1	[23]	0	1	1	3	3	0	0	0	2	0	2	2	2	0	0	1	[35]
Savannakhet	6	3						0	1	[20]					3	3	0	2	1	[23]				0	[23]				1	[23]	0	1	1	3	3	0	0	0	2	0	2	2	2	0	0	1	[35]
Phongsali	5	2						0	1	[20]					2	0	0	2	0	[23]				0	[23]				1	[23]	0	1	1	3	3	0	0	0	2	0	2	2	2	0	0	1	[35]
Bokeo	5	2						0	1	[20]					2	0	0	2	0	[23]				0	[23]				1	[23]	0	1	1	3	3	0	0	0	2	0	2	2	2	0	0	1	[35]
Xaignabouli	5	2						0	1	[20]					2	0	0	2	0	[23]				0	[23]				1	[23]	0	1	1	3	3	0	0	0	2	0	2	2	2	0	0	1	[35]
Vientiane capital	5	2						0	1	[20]					2	0	0	2	0	[23]				0	[23]				1	[23]	0	1	1	3	3	0	0	0	2	0	2	2	2	0	0	1	[35]
Vietnam
Da Nang	6	3						0	1	[20]					3	3	0	2	1	[23]				0	[23]				1	[23]	0	1	1	3	3	0	0	0	2	0	2	2	0	0	0	1	[35]
Ho Chi Minh	6	3						0	1	[20]					3	3	0	2	1	[23]				0	[23]				1	[23]	0	1	1	3	3	0	0	0	2	0	2	2	0	0	0	1	[35]
Tuyen Quang	0	1						0	1	[20]					0	0	0	0	0	[23]				0	[23]				0	[23]	-2	0	0	2	0	0	0	0	2	0	2	2	0	0	0	0	[35]
Bac Giang	0	1						0	1	[20]					0	0	0	0	0	[23]				0	[23]				0	[23]	-2	0	0	2	0	0	0	0	2	0	2	2	0	0	0	0	[35]
Nghe An	4	2						0	1	[20]					2	0	0	2	0	[23]				0	[23]				1	[23]	0	1	1	2	0	0	0	0	2	0	2	2	2	0	0	0	[35]
Bac Lieu	6	3						0	1	[20]					3	3	0	0	1	[23]				0	[23]				0	[23]	0	1	1	3	3	0	0	0	0	0	2	2	0	0	0	1	[35]
An Giang	6	3						0	1	[20]					3	3	0	2	1	[23]				0	[23]				1	[23]	0	1	1	3	3	0	0	0	2	0	2	2	0	0	0	1	[35]
Dien Bien Phu	1	2						0	1	[20]					0	0	0	0	0	[23]				0	[23]				0	[23]	-1	0	1	2	0	0	0	0	2	0	2	2	2	0	0	0	[35]
Can Tho	6	3						0	1	[20]					3	3	0	0	1	[23]				0	[23]				0	[23]	0	1	1	3	3	0	0	0	2	0	2	2	0	0	0	1	[35]
Thai Nguyen	0	1						0	1	[20]					0	0	0	0	0	[23]				0	[23]				0	[23]	-2	0	0	2	0	0	0	0	2	0	2	2	0	0	0	0	[35]
Vinh Phuc	0	1						0	1	[20]					0	0	0	0	0	[23]				0	[23]				0	[23]	-2	0	0	2	0	0	0	0	2	0	2	2	0	0	0	0	[35]
Tay Ninh	6	3						0	1	[20]					3	3	0	2	1	[23]				0	[23]				1	[23]	0	1	1	3	3	0	0	0	2	0	2	2	0	0	0	1	[35]
Thai Binh	0	1						0	1	[20]					0	0	0	0	0	[23]				0	[23]				0	[23]	-2	0	0	2	0	0	0	0	2	0	2	2	0	0	0	0	[35]
Nam Dinh	0	1						0	1	[20]					0	0	0	0	0	[23]				0	[23]				0	[23]	-2	0	0	2	0	0	0	0	2	0	2	2	0	0	0	0	[35]
Lam Dong	6	3						0	1	[20]					3	3	0	2	1	[23]				0	[23]				1	[23]	0	1	1	3	3	0	0	0	2	0	2	2	2	0	0	1	[35]
Kon Tum	6	3						0	1	[20]					3	3	0	2	1	[23]				0	[23]				1	[23]	0	1	1	3	3	0	0	0	2	0	2	2	2	0	0	1	[35]
Ninh Thuan	9	4	9	Singh PCR & sequenced S-Type SSU rRNA gene	2005	human	[7]	0	1	[20]					3	3	0	2	1	[23]				0	[23]				1	[23]	0	1	1	3	3	0	0	0	2	0	2	2	0	0	0	1	[35]
Quang Tri	6	3						0	1	[20]					3	3	0	2	1	[23]				0	[23]				1	[23]	0	1	1	3	3	0	0	0	2	0	2	2	2	0	0	1	[35]
Hai Phong	0	1						0	1	[20]					0	0	0	0	0	[23]				0	[23]				0	[23]	-2	0	0	2	0	0	0	0	2	0	2	2	0	0	0	0	[35]
Binh Duong	6	3						0	1	[20]					3	3	0	2	1	[23]				0	[23]				1	[23]	0	1	1	3	3	0	0	0	2	0	2	2	2	0	0	1	[35]
Lao Cai	0	1						0	1	[20]					0	0	0	0	0	[23]				0	[23]				0	[23]	-2	0	0	2	0	0	0	0	2	0	2	2	0	0	0	0	[35]
Hau Giang	6	3						0	1	[20]					3	3	0	0	1	[23]				0	[23]				0	[23]	0	1	1	3	3	0	0	0	0	0	2	2	0	0	0	1	[35]
Ba Ria Vung Tau	6	3						0	1	[20]					3	3	0	2	1	[23]				0	[23]				1	[23]	0	1	1	3	3	0	0	0	2	0	2	2	2	0	0	1	[35]
Ha Tay	0	1						0	1	[20]					0	0	0	0	0	[23]				0	[23]				0	[23]	-2	0	0	2	0	0	0	0	2	0	2	2	0	0	0	0	[35]
Cao Bang	0	1						0	1	[20]					0	0	0	0	0	[23]				0	[23]				0	[23]	-2	0	0	2	0	0	0	0	2	0	2	2	0	0	0	0	[35]
Khanh Hoa	9	4	9	Singh PCR & Imwong PCR	2010	human/mosquito	[8]	0	1	[20]					3	3	0	2	1	[23]				0	[23]				1	[23]	0	1	1	3	3	0	0	0	2	0	2	2	0	0	0	1	[35]
Bac Kan	0	1						0	1	[20]					0	0	0	0	0	[23]				0	[23]				0	[23]	-2	0	0	2	0	0	0	0	2	0	2	2	0	0	0	0	[35]
Dong Thap	6	3						0	1	[20]					3	3	0	0	1	[23]				0	[23]				0	[23]	0	1	1	3	3	0	0	0	2	0	2	2	0	0	0	1	[35]
Ben Tre	6	3						0	1	[20]					3	3	0	0	1	[23]				0	[23]				0	[23]	0	1	1	3	3	0	0	0	2	0	2	2	0	0	0	1	[35]
Ca Mau	6	3						0	1	[20]					3	3	0	0	1	[23]				0	[23]				0	[23]	0	1	1	3	3	0	0	0	0	0	2	2	0	0	0	1	[35]
Thanh Hoa	1	2						0	1	[20]					0	0	0	0	0	[23]				0	[23]				0	[23]	-1	0	1	2	0	0	0	0	2	0	2	2	0	0	0	0	[35]
Long An	6	3						0	1	[20]					3	3	0	2	1	[23]				0	[23]				1	[23]	0	1	1	3	3	0	0	0	2	0	2	2	0	0	0	1	[35]
Quang Nam	6	3						0	1	[20]					3	3	0	2	1	[23]				0	[23]				1	[23]	0	1	1	3	3	0	0	0	2	0	2	2	0	0	0	1	[35]
Binh Dinh	6	3						0	1	[20]					3	3	0	2	1	[23]				0	[23]				1	[23]	0	1	1	3	3	0	0	0	2	0	2	2	0	0	0	1	[35]
Ha Noi	0	1						0	1	[20]					0	0	0	0	0	[23]				0	[23]				0	[23]	-2	0	0	2	0	0	0	0	2	0	2	2	0	0	0	0	[35]
Kien Giang	6	3						0	1	[20]					3	3	0	2	1	[23]				0	[23]				1	[23]	0	1	1	3	3	0	0	0	2	0	2	2	0	0	0	1	[35]
Hai Duong	0	1						0	1	[20]					0	0	0	0	0	[23]				0	[23]				0	[23]	-2	0	0	2	0	0	0	0	2	0	2	2	0	0	0	0	[35]
Tien Giang	6	3						0	1	[20]					3	3	0	2	1	[23]				0	[23]				1	[23]	0	1	1	3	3	0	0	0	2	0	2	2	0	0	0	1	[35]
Dong Nai	6	3						0	1	[20]					3	3	0	2	1	[23]				0	[23]				1	[23]	0	1	1	3	3	0	0	0	2	0	2	2	2	0	0	1	[35]
Quang Ngai	6	3						0	1	[20]					3	3	0	2	1	[23]				0	[23]				1	[23]	0	1	1	3	3	0	0	0	2	0	2	2	0	0	0	1	[35]
Gia Lai	6	3						0	1	[20]					3	3	0	2	1	[23]				0	[23]				1	[23]	0	1	1	3	3	0	0	0	2	0	2	2	2	0	0	1	[35]
Ninh Binh	0	1						0	1	[20]					0	0	0	0	0	[23]				0	[23]				0	[23]	-2	0	0	2	0	0	0	0	2	0	2	2	0	0	0	0	[35]
Bac Ninh	0	1						0	1	[20]					0	0	0	0	0	[23]				0	[23]				0	[23]	-2	0	0	2	0	0	0	0	2	0	2	2	0	0	0	0	[35]
Ha Nam	0	1						0	1	[20]					0	0	0	0	0	[23]				0	[23]				0	[23]	-2	0	0	2	0	0	0	0	2	0	2	2	0	0	0	0	[35]
Binh Phuoc	6	3						0	1	[20]					3	3	0	2	1	[23]				0	[23]				1	[23]	0	1	1	3	3	0	0	0	2	0	2	2	2	0	0	1	[35]
Dak Nong	6	3						0	1	[20]					3	3	0	2	1	[23]				0	[23]				1	[23]	0	1	1	3	3	0	0	0	2	0	2	2	2	0	0	1	[35]
Son La	1	2						0	1	[20]					0	0	0	0	0	[23]				0	[23]				0	[23]	-1	0	1	2	0	0	0	0	2	0	2	2	2	0	0	0	[35]
Phu Tho	0	1						0	1	[20]					0	0	0	0	0	[23]				0	[23]				0	[23]	-2	0	0	2	0	0	0	0	2	0	2	2	0	0	0	0	[35]
Yen Bai	0	1						0	1	[20]					0	0	0	0	0	[23]				0	[23]				0	[23]	-2	0	0	2	0	0	0	0	2	0	2	2	0	0	0	0	[35]
Quang Binh	6	3						0	1	[20]					3	3	0	2	1	[23]				0	[23]				1	[23]	0	1	1	3	3	0	0	0	2	0	2	2	2	0	0	1	[35]
Hoa Binh	0	1						0	1	[20]					0	0	0	0	0	[23]				0	[23]				0	[23]	-2	0	0	2	0	0	0	0	2	0	2	2	0	0	0	0	[35]
Phu Yen	6	3						0	1	[20]					3	3	0	2	1	[23]				0	[23]				1	[23]	0	1	1	3	3	0	0	0	2	0	2	2	0	0	0	1	[35]
Ha Giang	0	1						0	1	[20]					0	0	0	0	0	[23]				0	[23]				0	[23]	-2	0	0	2	0	0	0	0	2	0	2	2	0	0	0	0	[35]
Hung Yen	0	1						0	1	[20]					0	0	0	0	0	[23]				0	[23]				0	[23]	-2	0	0	2	0	0	0	0	2	0	2	2	0	0	0	0	[35]
Quang Ninh	0	1						0	1	[20]					0	0	0	0	0	[23]				0	[23]				0	[23]	-2	0	0	2	0	0	0	0	2	0	2	2	0	0	0	0	[35]
Dak Lak	6	3						0	1	[20]					3	3	0	2	1	[23]				0	[23]				1	[23]	0	1	1	3	3	0	0	0	2	0	2	2	2	0	0	1	[35]
Soc Trang	6	3						0	1	[20]					3	3	0	0	1	[23]				0	[23]				0	[23]	0	1	1	3	3	0	0	0	0	0	2	2	0	0	0	1	[35]
Vinh Long	6	3						0	1	[20]					3	3	0	0	1	[23]				0	[23]				0	[23]	0	1	1	3	3	0	0	0	2	0	2	2	0	0	0	1	[35]
Tra Vinh	6	3						0	1	[20]					3	3	0	0	1	[23]				0	[23]				0	[23]	0	1	1	3	3	0	0	0	0	0	2	2	0	0	0	1	[35]
Binh Thuan	6	3						0	1	[20]					3	3	0	2	1	[23]				0	[23]				1	[23]	0	1	1	3	3	0	0	0	2	0	2	2	2	0	0	1	[35]
Lang Son	0	1						0	1	[20]					0	0	0	0	0	[23]				0	[23]				0	[23]	-2	0	0	2	0	0	0	0	2	0	2	2	0	0	0	0	[35]
Lai Chau	1	2						0	1	[20]					0	0	0	0	0	[23]				0	[23]				0	[23]	-1	0	1	2	0	0	0	0	2	0	2	2	2	0	0	0	[35]
Thua Thien Hue	6	3						0	1	[20]					3	3	0	2	1	[23]				0	[23]				1	[23]	0	1	1	3	3	0	0	0	2	0	2	2	0	0	0	1	[35]
Ha Tinh	4	2						0	1	[20]					2	0	0	2	0	[23]				0	[23]				1	[23]	0	1	1	2	0	0	0	0	2	0	2	2	2	0	0	0	[35]
Malaysia
Selangor	9	4	9	microscopy & Singh PCR & sequenced csp gene fragment	2008	human/monkey/mosquito	[9]	0	1	[20]					3	3	3	0	1	[23]				1	[23]				0	[23]	0	1	1	3	3	3	0	0	2	0	2	2	0	0	0	1	[35]
Pulau Pinang	9	4	9	microscopy & Singh PCR & sequenced csp gene fragment	2008	human/monkey/mosquito	[9]	0	1	[20]					3	3	3	0	1	[23]				1	[23]				0	[23]	0	1	1	3	3	3	0	0	2	0	2	2	0	0	0	1	[35]
Sarawak	9	4	9	microscopy, PCR of SSU rRNA & sequenced PCR product	2011	human	[10]	0	1	[20]					3	3	3	0	1	[23]				1	[23]				0	[23]	0	1	1	3	0	3	3	0	0	0	0	2	0	2	0	0	[35]
Perak	9	4	9	Singh PCR	2010	human	[11]	0	1	[20]					3	3	3	0	1	[23]				1	[23]				0	[23]	0	1	1	3	3	3	0	0	2	0	2	2	0	0	0	1	[35]
Melaka	9	4	9	microscopy & Singh PCR & sequenced csp gene fragment	2008	human/monkey/mosquito	[9]	0	1	[20]					3	3	3	0	1	[23]				1	[23]				0	[23]	0	1	1	3	3	3	0	0	2	0	2	2	0	0	0	1	[35]
Kedah-	9	4	9	microscopy & Singh PCR & sequenced csp gene fragment	2008	human/monkey/mosquito	[9]	0	1	[20]					3	3	3	0	1	[23]				1	[23]				0	[23]	0	1	1	3	3	3	0	0	2	0	2	2	0	0	0	1	[35]
Sabah-	9	4	9	microscopy & Snounou PCR	2010	human	[12]	0	1	[20]					3	3	3	0	1	[23]				1	[23]				0	[23]	0	1	1	3	0	3	3	0	0	0	0	2	0	2	0	0	[35]
Terengganu-	6	3						0	1	[20]					3	3	3	0	1	[23]				1	[23]				0	[23]	0	1	1	3	3	3	0	0	2	0	2	2	0	0	0	1	[35]
Perlis	6	3						0	1	[20]					3	3	3	0	1	[23]				1	[23]				0	[23]	0	1	1	3	3	3	0	0	2	0	2	2	0	0	0	1	[35]
Kelantan	9	4	9	microscopy & Singh PCR	2010	human	[13]	0	1	[20]					3	3	3	0	1	[23]				1	[23]				0	[23]	0	1	1	3	3	3	0	0	2	0	2	2	0	0	0	1	[35]
Pahang-	9	4	9	Singh PCR	2009	human	[11]	0	1	[20]					3	3	3	0	1	[23]				1	[23]				0	[23]	0	1	1	3	3	3	0	0	2	0	2	2	0	0	0	1	[35]
Labuan	2	2						0	1	[20]					0	0	0	0	0	[23]				0	[23]				0	[23]	-1	0	1	3	0	0	3	0	0	0	0	2	0	2	0	0	[35]
Johor	9	4	9	microscopy & Singh PCR	2010	human	[13]	0	1	[20]					3	3	3	0	1	[23]				1	[23]				0	[23]	0	1	1	3	3	3	0	0	2	0	2	2	0	0	0	1	[35]
Kuala Lumpur	7	4	4	microscopy & Singh PCR & sequenced csp gene fragment	2008	monkey	[9]	0	1	[20]					3	3	3	0	1	[23]				1	[23]				0	[23]	0	1	1	3	3	3	0	0	2	0	2	2	0	0	0	1	[35]
Negeri Sembilan	6	3						0	1	[20]					3	3	3	0	1	[23]				1	[23]				0	[23]	0	1	1	3	3	3	0	0	2	0	2	2	0	0	0	1	[35]
Banggi	9	4	9	microscopy & Singh PCR	2011	human	[14]	0	1	[20]					3	3	0	0	0	[23]	3	1996	[25]	0	[23]				0	[23]	0	0	1	3	0	0	3	0	0	0	0	2	0	2	0	0	[35]
Tiga	0	1						0	1	[20]					0	0	0	0	0	[23]				0	[23]				0	[23]	-1	0	1	1	0	0	0	0	0	0	0	0	0	0	1	0	[35]
Langkawi archipelago	6	3						0	1	[20]					3	3	0	0	0	[23]	3	2012	[26]	0	[23]				0	[23]	0	0	1	3	3	3	0	0	2	0	2	2	0	0	0	1	[35]
Redang+	6	3						0	1	[20]					3	3	0	0	0	[23]	3	2003	[27]	0	[23]				0	[23]	0	0	1	3	3	3	0	0	0	0	2	2	0	0	0	1	[35]
Tioman	6	3						0	1	[20]					3	0	3	0	0	[23]				1	[23]				0	[23]	0	1	1	3	3	3	0	0	2	0	2	2	0	0	0	1	[35]
Brunei	6	3													3	3	3	0	1	[23]				1	[23]				0	[23]	0	1	1	3	0	3	3	0	0	0	0	2	0	2	0	0	[35]
Philippines
Babuyan	0	1						0			1	[21]	1	[22]	0	0	0	0	0	[23]				0	[23]				0	[23]	-1	0	1	1	0	0	0	0	0	0	0	0	0	0	1	0	[35]
Balabac	6	3						0	1	[20]					3	3	0	0	1	[23]				0	[23]				0	[23]	0	1	1	3	0	0	3	0	0	0	0	2	0	2	0	0	[35]
Balut+	5	2						0	1	[20]					3	3	0	0	1	[23]				0	[23]				0	[23]	0	1	1	2	0	0	0	0	0	0	0	0	0	2	0	0	[35]
Bantayan	-2	1						-3	0	[20]					0	0	0	0	0	[23]				0	[23]				0	[23]	-1	0	1	2	0	0	0	0	0	0	0	0	0	2	0	0	[35]
Banton	1	2						0			1	[21]	1	[22]	0	0	0	0	0	[23]				0	[23]				0	[23]	-1	0	1	2	0	0	0	0	0	0	0	0	0	2	0	0	[35]
Basilan+	5	2						0	1	[20]					3	3	0	0	1	[23]				0	[23]				0	[23]	0	1	1	2	0	0	0	0	0	0	0	0	0	2	0	0	[35]
Batanes	-3	1						-3			0	[21]	0	[22]	0	0	0	0	0	[23]				0	[23]				0	[23]	-2	0	0	2	0	0	0	0	0	0	0	0	0	2	1	0	[35]
Bohol	2	2						-3	0	[20]					3	3	0	0	1	[23]				0	[23]				0	[23]	0	1	1	2	0	0	0	0	0	0	0	0	0	2	0	0	[35]
Burias	-2	1						-3	0	[20]					0	0	0	0	0	[23]				0	[23]				0	[23]	-1	0	1	2	0	0	0	0	0	0	0	0	0	2	0	0	[35]
Busuanga+	5	2						0	1	[20]					3	3	0	0	1	[23]				0	[23]				0	[23]	0	1	1	2	0	0	0	0	0	0	0	2	0	2	0	0	[35]
Camiguin	2	2						-3	0	[20]					3	3	0	0	1	[23]				0	[23]				0	[23]	0	1	1	2	0	0	0	0	0	0	0	0	0	2	0	0	[35]
Camotes	-2	1						-3	0	[20]					0	0	0	0	0	[23]				0	[23]				0	[23]	-1	0	1	2	0	0	0	0	0	0	0	0	0	2	0	0	[35]
Catanduanes	2	2						-3	0	[20]					3	3	0	0	1	[23]				0	[23]				0	[23]	0	1	1	2	0	0	0	0	0	0	0	0	0	2	0	0	[35]
Cebu	-2	1						-3	0	[20]					0	0	0	0	0	[23]				0	[23]				0	[23]	-1	0	1	2	0	0	0	0	0	0	0	0	0	2	0	0	[35]
Homonhon	-2	1						-3			0	[21]	0	[22]	0	0	0	0	0	[23]				0	[23]				0	[23]	-1	0	1	2	0	0	0	0	0	0	0	0	0	2	0	0	[35]
Lubang	1	2						0	1	[20]					0	0	0	0	0	[23]				0	[23]				0	[23]	-1	0	1	2	0	0	0	0	0	0	0	0	0	2	0	0	[35]
Luzon	5	2						0	1	[20]					3	3	0	0	1	[23]				0	[23]				0	[23]	0	1	1	2	0	0	0	0	0	0	0	0	0	2	0	0	[35]
Mapun	1	2						0	1	[20]					0	0	0	0	0	[23]				0	[23]				0	[23]	-1	0	1	2	0	0	0	0	0	0	0	0	0	2	0	0	[35]
Marin Duque	-2	1						-3	0	[20]					0	0	0	0	0	[23]				0	[23]				0	[23]	-1	0	1	2	0	0	0	0	0	0	0	0	0	2	0	0	[35]
Maripipi	2	2						-3			0	[21]	0	[22]	3	3	0	0	0	[23]	3	2013	[28]	0	[23]				0	[23]	0	0	1	2	0	0	0	0	0	0	0	0	0	2	0	0	[35]
Masbate	-2	1						-3	0	[20]					0	0	0	0	0	[23]				0	[23]				0	[23]	-1	0	1	2	0	0	0	0	0	0	0	0	0	2	0	0	[35]
Mindanao	5	2						0	1	[20]					3	3	0	0	1	[23]				0	[23]				0	[23]	0	1	1	2	0	0	0	0	0	0	0	0	0	2	0	0	[35]
Mindoro	5	2						0	1	[20]					3	3	0	0	1	[23]				0	[23]				0	[23]	0	1	1	2	0	0	0	0	0	0	0	0	0	2	0	0	[35]
Negros	2	2						-3	0	[20]					3	3	0	0	1	[23]				0	[23]				0	[23]	0	1	1	2	0	0	0	0	0	0	0	0	0	2	0	0	[35]
Palawan	9	4	9	microscopy & sequenced SSU rRNA gene fragment	2008	human	[15]	0	1	[20]					3	3	0	0	1	[23]				0	[23]				0	[23]	0	1	1	3	0	0	3	0	0	0	0	2	0	2	0	0	[35]
Panay+	2	2						-3	0	[20]					3	3	0	0	1	[23]				0	[23]				0	[23]	0	1	1	2	0	0	0	0	0	0	0	0	0	2	0	0	[35]
Panguturan+	1	2						0	1	[20]					0	0	0	0	0	[23]				0	[23]				0	[23]	-1	0	1	2	0	0	0	0	0	0	0	0	0	2	0	0	[35]
Patnanongon	1	2						0	1	[20]					0	0	0	0	0	[23]				0	[23]				0	[23]	-1	0	1	2	0	0	0	0	0	0	0	0	0	2	0	0	[35]
Polillo	1	2						0	1	[20]					0	0	0	0	0	[23]				0	[23]				0	[23]	-1	0	1	2	0	0	0	0	0	0	0	0	0	2	0	0	[35]
Romblon	-2	1						-3	0	[20]					0	0	0	0	0	[23]				0	[23]				0	[23]	-1	0	1	2	0	0	0	0	0	0	0	0	0	2	0	0	[35]
Siargao+	-2	1						-3	0	[20]					0	0	0	0	0	[23]				0	[23]				0	[23]	-1	0	1	2	0	0	0	0	0	0	0	0	0	2	0	0	[35]
Sibale	1	2						0			1	[21]	1	[22]	0	0	0	0	0	[23]				0	[23]				0	[23]	-1	0	1	2	0	0	0	0	0	0	0	0	0	2	0	0	[35]
Sibutu+	1	2						0	1	[20]					0	0	0	0	0	[23]				0	[23]				0	[23]	-1	0	1	2	0	0	0	0	0	0	0	0	0	2	0	0	[35]
Sibuyan	2	2						-3	0	[20]					3	3	0	0	1	[23]				0	[23]				0	[23]	0	1	1	2	0	0	0	0	0	0	0	0	0	2	0	0	[35]
Simara	1	2						0			1	[21]	1	[22]	0	0	0	0	0	[23]				0	[23]				0	[23]	-1	0	1	2	0	0	0	0	0	0	0	0	0	2	0	0	[35]
Siqiujar	-2	1						-3	0	[20]					0	0	0	0	0	[23]				0	[23]				0	[23]	-1	0	1	2	0	0	0	0	0	0	0	0	0	2	0	0	[35]
Sulu+	5	2						0	1	[20]					3	3	0	0	1	[23]				0	[23]				0	[23]	0	1	1	2	0	0	0	0	0	0	0	0	0	2	0	0	[35]
Tablas	-2	1						-3	0	[20]					0	0	0	0	0	[23]				0	[23]				0	[23]	-1	0	1	2	0	0	0	0	0	0	0	0	0	2	0	0	[35]
Tawa Tawa+	2	2						0	1	[20]					0	0	0	0	0	[23]				0	[23]				0	[23]	0	1	1	2	0	0	0	0	0	0	0	0	0	2	0	0	[35]
Ticao	-2	1						-3	0	[20]					0	0	0	0	0	[23]				0	[23]				0	[23]	-1	0	1	2	0	0	0	0	0	0	0	0	0	2	0	0	[35]
Samar/Leyte+	5	2						0	1	[20]					3	3	0	0	1	[23]				0	[23]				0	[23]	0	1	1	2	0	0	0	0	0	0	0	0	0	2	0	0	[35]
Indonesia
Papua Barat	2	2						0	1	[20]					0	0	0	0	0	[23]				0	[23]				0	[23]	0	1	1	2	0	0	0	0	0	2	0	0	0	0	0	0	[35]
Papua	5	2						0	1	[20]					3	3	0	0	0	[23]	3	2003	[29]	0	[23]				0	[23]	0	1	1	2	0	0	0	0	0	2	0	0	0	0	0	0	[35]
Nanggroe Aceh Darusalam	6	3						0	1	[20]					3	3	3	0	1	[23]				1	[23]				0	[23]	0	1	1	3	3	3	0	0	0	0	2	2	0	2	0	1	[35]
Sumatera Utara	6	3						0	1	[20]					3	3	3	0	1	[23]				1	[23]				0	[23]	0	1	1	3	0	3	0	0	0	0	2	2	0	2	0	0	[35]
Sumatera Barat	6	3						0	1	[20]					3	3	3	0	1	[23]				1	[23]				0	[23]	0	1	1	3	0	3	0	0	0	0	2	2	0	2	0	0	[35]
Riau	6	3						0	1	[20]					3	3	3	0	1	[23]				1	[23]				0	[23]	0	1	1	3	0	3	0	0	0	0	2	2	0	2	0	0	[35]
Jambi	6	3						0	1	[20]					3	3	3	0	1	[23]				1	[23]				0	[23]	0	1	1	3	0	3	0	0	0	0	2	2	0	2	0	0	[35]
Bengkulu	6	3						0	1	[20]					3	3	3	0	1	[23]				1	[23]				0	[23]	0	1	1	3	0	3	0	0	0	0	2	2	0	2	0	0	[35]
Sumatera Selatan	6	3						0	1	[20]					3	3	3	0	1	[23]				1	[23]				0	[23]	0	1	1	3	0	3	0	0	0	0	2	2	0	2	0	0	[35]
Lampung	6	3						0	1	[20]					3	3	3	0	1	[23]				1	[23]				0	[23]	0	1	1	3	0	3	0	0	0	0	2	2	0	2	0	0	[35]
Banten	5	2						0	1	[20]					3	3	0	0	1	[23]				0	[23]				0	[23]	0	1	1	2	0	0	0	0	0	0	2	2	0	2	0	0	[35]
DKI Jakarta	5	2						0	1	[20]					3	3	0	0	1	[23]				0	[23]				0	[23]	0	1	1	2	0	0	0	0	0	0	2	2	0	2	0	0	[35]
Jaw Timur	5	2						0	1	[20]					3	3	0	0	1	[23]				0	[23]				0	[23]	0	1	1	2	0	0	0	0	0	0	2	2	0	2	0	0	[35]
Jawa Barat	5	2						0	1	[20]					3	3	0	0	1	[23]				0	[23]				0	[23]	0	1	1	2	0	0	0	0	0	0	2	2	0	2	0	0	[35]
Jawa Tengah	6	3						0	1	[20]					3	3	0	0	1	[23]				0	[23]				0	[23]	0	1	1	3	0	0	3	0	0	0	2	2	0	2	0	0	[35]
Di Yogyakarta	6	3						0	1	[20]					3	3	0	0	1	[23]				0	[23]				0	[23]	0	1	1	3	0	0	3	0	0	0	2	2	0	2	0	0	[35]
Kalimantan Selatan	9	4	9	microscopy & Singh PCR & sequenced SSU rRNA gene product	2010	human	[16]	0	1	[20]					3	3	3	0	1	[23]				1	[23]				0	[23]	0	1	1	3	0	3	3	0	0	0	2	2	0	2	0	0	[35]
Kalimantan Timur	6	3						0	1	[20]					3	3	3	0	1	[23]				1	[23]				0	[23]	0	1	1	3	0	3	3	0	0	0	0	2	0	2	0	0	[35]
Kalimantan Tengah	6	3						0	1	[20]					3	3	3	0	1	[23]				1	[23]				0	[23]	0	1	1	3	0	3	3	0	0	0	2	2	0	2	0	0	[35]
Kalimantan Barat	6	3						0	1	[20]					3	3	3	0	1	[23]				1	[23]				0	[23]	0	1	1	3	0	3	0	0	0	0	0	2	0	2	0	0	[35]
Sulawesi Selatan	5	2						0	1	[20]					3	3	0	0	0	[23]	3	2004	[30]	0	[23]				0	[23]	0	1	1	2	0	0	0	0	0	0	2	0	0	2	0	0	[35]
Sulawesi Barat	2	2						0	1	[20]					0	0	0	0	0	[23]				0	[23]				0	[23]	0	1	1	2	0	0	0	0	0	0	2	0	0	2	0	0	[35]
Gorontolo	2	2						0	1	[20]					0	0	0	0	0	[23]				0	[23]				0	[23]	0	1	1	2	0	0	0	0	0	0	2	0	0	2	0	0	[35]
Sulawesi Tenggara	2	2						0	1	[20]					0	0	0	0	0	[23]				0	[23]				0	[23]	0	1	1	2	0	0	0	0	0	0	2	0	0	2	0	0	[35]
Sulawesi Tengah	3	2						0	1	[20]					0	0	0	0	0	[23]				0	[23]				0	[23]	0	1	1	3	0	3	0	0	0	0	2	0	0	2	0	0	[35]
Sulawesi Utara	7	4	4	molecular confirmation	2006	monkey	[17]	0	1	[20]					3	3	0	0	0	[23]	3	2004	[30]	0	[23]				0	[23]	0	1	1	3	0	0	3	0	0	0	2	0	0	2	0	0	[35]
Bali	5	2						0	1	[20]					3	3	0	0	1	[23]				0	[23]				0	[23]	0	1	1	2	0	0	0	0	0	0	2	2	0	2	0	0	[35]
Simeulue	5	2						0	1	[20]					3	3	0	0	1	[23]				0	[23]				0	[23]	0	1	1	2	0	0	0	0	0	0	2	0	0	2	1	0	[35]
Nias	5	2						0	1	[20]					3	3	0	0	1	[23]				0	[23]				0	[23]	0	1	1	2	0	0	0	0	0	0	2	0	0	2	0	0	[35]
Siberut	0	1						0	1	[20]					0	0	0	0	0	[23]				0	[23]				0	[23]	-2	0	0	2	0	0	0	0	0	0	2	0	0	2	0	0	[35]
Pagai+	1	2						0	1	[20]					0	0	0	0	0	[23]				0	[23]				0	[23]	-1	0	1	2	0	0	0	0	0	0	2	0	0	2	0	0	[35]
Enggano	0	1						0	1	[20]					0	0	0	0	0	[23]				0	[23]				0	[23]	-2	0	0	2	0	0	0	0	0	0	2	2	0	0	0	0	[35]
Bintan+	5	2						0	1	[20]					3	0	3	0	0	[23]				1	[23]				0	[23]	0	1	1	2	0	0	0	0	0	0	2	2	0	0	0	0	[35]
Bangka	5	2						0	1	[20]					3	3	3	0	1	[23]				1	[23]				0	[23]	0	1	1	2	0	0	0	0	0	0	2	2	0	2	0	0	[35]
Belitung	5	2						0	1	[20]					3	3	0	0	1	[23]				0	[23]				0	[23]	0	1	1	2	0	0	0	0	0	0	2	2	0	2	0	0	[35]
Natuna	5	2						0	1	[20]					3	3	0	0	1	[23]				0	[23]				0	[23]	0	1	1	2	0	0	0	0	0	0	0	2	0	0	0	0	[35]
Lombok	6	3						0	1	[20]					3	3	0	0	1	[23]				0	[23]				0	[23]	0	1	1	3	0	0	3	0	0	0	2	2	0	2	0	0	[35]
Kangean Island	4	2						0	1	[20]					2	2	0	0	0	[23]	2	1997	[31]	0	[23]				0	[23]	0	0	0	2	0	0	0	0	0	0	2	0	0	0	0	0	[35]
Taliwang (Sumbawa)	6	3						0	1	[20]					3	3	0	0	1	[23]				0	[23]				0	[23]	0	1	1	3	0	0	3	0	0	0	2	2	0	2	0	0	[35]
Sumba	5	2						0	1	[20]					3	3	0	0	1	[23]				0	[23]				0	[23]	0	1	1	2	0	0	0	0	0	0	2	2	0	2	0	0	[35]
Rintja/Kmodo	5	2						0	1	[20]					3	3	0	0	0	[23]	3	2012	[32]	0	[23]				0	[23]	0	0	1	2	0	0	0	0	0	0	2	0	0	2	0	0	[35]
Flores	5	2						0	1	[20]					3	3	0	0	1	[23]				0	[23]				0	[23]	0	1	1	2	0	0	0	0	0	0	2	2	0	2	0	0	[35]
Rote	1	2						0	1	[20]					0	0	0	0	0	[23]				0	[23]				0	[23]	-1	0	1	2	0	0	0	0	0	0	2	0	0	0	0	0	[35]
Selayar	0	1						0	1	[20]					0	0	0	0	0	[23]				0	[23]				0	[23]	-1	0	1	1	0	0	0	0	0	0	0	0	0	0	1	0	[35]
Butung+	2	2						0	1	[20]					0	0	0	0	0	[23]				0	[23]				0	[23]	0	1	1	2	0	0	0	0	0	0	0	0	0	2	0	0	[35]
Buru	1	2						0	1	[20]					0	0	0	0	0	[23]				0	[23]				0	[23]	0	1	1	1	0	0	0	0	0	0	0	0	0	0	1	0	[35]
Wetar	1	2						0	1	[20]					0	0	0	0	0	[23]				0	[23]				0	[23]	-1	0	1	2	0	0	0	0	0	0	0	0	0	2	0	0	[35]
Babar	1	2						0	1	[20]					0	0	0	0	0	[23]				0	[23]				0	[23]	0	1	1	1	0	0	0	0	0	0	0	0	0	0	1	0	[35]
Kepulauan Tanimbar	1	2						0	1	[20]					0	0	0	0	0	[23]				0	[23]				0	[23]	0	1	1	1	0	0	0	0	0	0	0	0	0	0	1	0	[35]
Kepulauan Aru	1	2						0	1	[20]					0	0	0	0	0	[23]				0	[23]				0	[23]	0	1	1	1	0	0	0	0	0	0	0	0	0	0	1	0	[35]
Talaud+	1	2						0	1	[20]					0	0	0	0	0	[23]				0	[23]				0	[23]	0	1	1	1	0	0	0	0	0	0	0	0	0	0	1	0	[35]
Sangihe+	1	2						0	1	[20]					0	0	0	0	0	[23]				0	[23]				0	[23]	0	1	1	1	0	0	0	0	0	0	0	0	0	0	1	0	[35]
Morotai	1	2						0	1	[20]					0	0	0	0	0	[23]				0	[23]				0	[23]	0	1	1	1	0	0	0	0	0	0	0	0	0	0	1	0	[35]
Halmahera	2	2						0	1	[20]					0	0	0	0	0	[23]				0	[23]				0	[23]	0	1	1	2	0	0	0	0	0	0	0	0	0	2	1	0	[35]
Bacan+	1	2						0	1	[20]					0	0	0	0	0	[23]				0	[23]				0	[23]	0	1	1	1	0	0	0	0	0	0	0	0	0	0	1	0	[35]
Sula	1	2						0	1	[20]					0	0	0	0	0	[23]				0	[23]				0	[23]	0	1	1	1	0	0	0	0	0	0	0	0	0	0	1	0	[35]
Obi	1	2						0	1	[20]					0	0	0	0	0	[23]				0	[23]				0	[23]	0	1	1	1	0	0	0	0	0	0	0	0	0	0	1	0	[35]
Waigeo+	1	2						0	1	[20]					0	0	0	0	0	[23]				0	[23]				0	[23]	0	1	1	1	0	0	0	0	0	0	0	0	0	0	1	0	[35]
Biak	2	2						0	1	[20]					0	0	0	0	0	[23]				0	[23]				0	[23]	0	1	1	2	0	0	0	0	0	2	0	0	0	0	0	0	[35]
Japen	2	2						0	1	[20]					0	0	0	0	0	[23]				0	[23]				0	[23]	0	1	1	2	0	0	0	0	0	2	0	0	0	0	0	0	[35]
Misod+	1	2						0	1	[20]					0	0	0	0	0	[23]				0	[23]				0	[23]	0	1	1	1	0	0	0	0	0	0	0	0	0	0	1	0	[35]
Ceram	1	2						0	1	[20]					0	0	0	0	0	[23]				0	[23]				0	[23]	0	1	1	1	0	0	0	0	0	0	0	0	0	0	1	0	[35]
Sipura	0	1						0	1	[20]					0	0	0	0	0	[23]				0	[23]				0	[23]	-2	0	0	2	0	0	0	0	0	0	2	0	0	2	0	0	[35]
Sawa	0	1						0	1	[20]					0	0	0	0	0	[23]				0	[23]				0	[23]	-2	0	0	2	0	0	0	0	0	0	2	0	0	0	0	0	[35]
Leti	0	1						0	1	[20]					0	0	0	0	0	[23]				0	[23]				0	[23]	-1	0	1	1	0	0	0	0	0	0	0	0	0	0	1	0	[35]
Damar	1	2						0	1	[20]					0	0	0	0	0	[23]				0	[23]				0	[23]	0	1	1	1	0	0	0	0	0	0	0	0	0	0	1	0	[35]
Kai Besar	1	2						0	1	[20]					0	0	0	0	0	[23]				0	[23]				0	[23]	0	1	1	1	0	0	0	0	0	0	0	0	0	0	1	0	[35]
Numfoor	2	2						0	1	[20]					0	0	0	0	0	[23]				0	[23]				0	[23]	0	1	1	2	0	0	0	0	0	2	0	0	0	0	0	0	[35]
Peleng	2	2						0	1	[20]					0	0	0	0	0	[23]				0	[23]				0	[23]	0	1	1	2	0	0	0	0	0	0	2	0	0	2	0	0	[35]
Tuangku	1	2						0	1	[20]					0	0	0	0	0	[23]				0	[23]				0	[23]	-1	0	1	2	0	0	0	0	0	0	0	2	0	0	0	0	[35]
Kabaena	5	2						0	1	[20]					3	3	0	0	0	[23]	3	2011	[33]	0	[23]				0	[23]	0	1	1	2	0	0	0	0	0	0	0	0	0	2	0	0	[35]
Pini	1	2						0	1	[20]					0	0	0	0	0	[23]				0	[23]				0	[23]	-1	0	1	2	0	0	0	0	0	0	0	2	0	2	0	0	[35]
Tanahbala+	1	2						0	1	[20]					0	0	0	0	0	[23]				0	[23]				0	[23]	-1	0	1	2	0	0	0	0	0	0	0	0	0	2	0	0	[35]
Jemaja+	1	2						0	1	[20]					0	0	0	0	0	[23]				0	[23]				0	[23]	-2	0	0	3	0	3	0	0	0	0	0	2	0	0	0	0	[35]
Bawean	0	1						0	1	[20]					0	0	0	0	0	[23]				0	[23]				0	[23]	-2	0	0	2	0	0	0	0	0	0	2	2	0	2	0	0	[35]
Batudaka+	2	2						0	1	[20]					0	0	0	0	0	[23]				0	[23]				0	[23]	0	1	1	2	0	0	0	0	0	0	0	0	0	2	0	0	[35]
Timor (whole island)	5	2						0	1	[20]					3	3	0	0	1	[23]				0	[23]				0	[23]	0	1	1	2	0	0	0	0	0	0	2	2	0	2	0	0	[35]
Singapore	9	4	9	Singh PCR & sequenced csp fragment	2008	human/monkey	[18]								3	3	3	0	1	[23]				1	[23]				0	[23]	0	1	1	3	0	3	0	0	2	0	0	2	0	0	1	0	[35]
Bangladesh
Chittagong	6	3						0	1	[20]					3	3	0	2	1	[23]				0	[23]				1	[23]	0	1	1	3	3	0	0	0	2	0	2	2	2	0	0	1	[35]
Dhaka	5	2						0	1	[20]					2	0	0	2	0	[23]				0	[23]				1	[23]	0	1	1	3	3	0	0	0	2	0	2	2	2	0	0	1	[35]
Barisal	-1	1						-3	0	[20]					0	0	0	0	0	[23]				0	[23]				0	[23]	-1	0	1	3	3	0	0	0	2	0	2	2	2	0	0	1	[35]
Rajshahi	2	2						-3	0	[20]					2	0	0	2	0	[23]				0	[23]				1	[23]	0	1	1	3	3	0	0	2	2	0	2	2	2	0	0	1	[35]
Sylhet	5	2						0	1	[20]					2	0	0	2	0	[23]				0	[23]				1	[23]	0	1	1	3	3	0	0	0	2	0	2	2	2	0	0	1	[35]
Khulna	-1	1						-3	0	[20]					0	0	0	0	0	[23]				0	[23]				0	[23]	-1	0	1	3	3	0	0	0	2	0	2	2	2	0	0	1	[35]
Nepal
Far Western	0	1						0	1	[20]					0	0	0	0	0	[23]				0	[23]				0	[23]	-2	0	0	2	0	0	0	2	0	0	2	2	2	0	0	0	[35]
Eastern	0	1						0	1	[20]					0	0	0	0	0	[23]				0	[23]				0	[23]	-2	0	0	2	0	0	0	2	0	0	2	2	2	0	0	0	[35]
Western	0	1						0	1	[20]					0	0	0	0	0	[23]				0	[23]				0	[23]	-2	0	0	2	0	0	0	2	0	0	2	2	2	0	0	0	[35]
Central	0	1						0	1	[20]					0	0	0	0	0	[23]				0	[23]				0	[23]	-2	0	0	2	0	0	0	2	0	0	2	2	2	0	0	0	[35]
Mid Western	0	1						0	1	[20]					0	0	0	0	0	[23]				0	[23]				0	[23]	-2	0	0	2	0	0	0	2	0	0	2	2	2	0	0	0	[35]
Taiwan	1	2													0	0	0	0	0	[23]				0	[23]				0	[23]	-2	0	0	3	3	0	0	0	2	0	0	0	0	0	0	1	[35]
India
Manipur	5	2						0	1	[20]					2	0	0	2	0	[23]				0	[23]				1	[23]	0	1	1	3	3	0	0	0	2	0	2	2	2	0	0	1	[35]
Haryana	0	1						0	1	[20]					0	0	0	0	0	[23]				0	[23]				0	[23]	-2	0	0	2	0	0	0	2	0	0	0	2	2	0	0	0	[35]
Mizoram	5	2						0	1	[20]					2	0	0	2	0	[23]				0	[23]				1	[23]	0	1	1	3	3	0	0	0	2	0	2	2	2	0	0	1	[35]
Himachal Pradesh	0	1						0	1	[20]					0	0	0	0	0	[23]				0	[23]				0	[23]	-2	0	0	2	0	0	0	2	0	0	0	0	2	0	0	0	[35]
Andhra Pradesh	0	1						0	1	[20]					0	0	0	0	0	[23]				0	[23]				0	[23]	-2	0	0	2	0	0	0	2	2	0	2	2	2	0	0	0	[35]
Uttarakhand	0	1						0	1	[20]					0	0	0	0	0	[23]				0	[23]				0	[23]	-2	0	0	2	0	0	0	2	0	0	2	2	2	0	0	0	[35]
Puducherry	0	1						0	1	[20]					0	0	0	0	0	[23]				0	[23]				0	[23]	-2	0	0	2	0	0	0	2	0	0	2	2	2	0	0	0	[35]
Smith Island+	9	4	9	Sequenced products of Jongwutiwes PCR and MSP1 PCR	unknown	human	[19]	0	1	[20]					0	0	0	0	0	[23]				0	[23]				0	[23]	-2	0	0	3	3	0	0	0	0	0	0	0	0	0	0	1	[35]
Little Andaman	1	2						0	1	[20]					0	0	0	0	0	[23]				0	[23]				0	[23]	-2	0	0	3	3	0	0	0	0	0	0	0	0	0	0	1	[35]
Car Nicobar	9	4	9	Sequenced products of Jongwutiwes PCR and MSP1 PCR	unknown	human	[19]	0	1	[20]					0	0	0	0	0	[23]				0	[23]				0	[23]	-2	0	0	3	3	0	0	0	0	0	0	0	0	0	0	1	[35]
Katchal/Teressa+	9	4	9	Sequenced products of Jongwutiwes PCR and MSP1 PCR	unknown	human	[19]	0	1	[20]					3	3	0	0	1	[23]				0	[23]				0	[23]	0	1	1	3	3	0	0	0	0	0	0	0	0	0	0	1	[35]
Little Nicobar	6	3						0	1	[20]					3	3	0	0	1	[23]				0	[23]				0	[23]	0	1	1	3	3	0	0	0	0	0	0	0	0	0	0	1	[35]
Great Nicobar	9	4	9	Sequenced products of Jongwutiwes PCR and MSP1 PCR	unknown	human	[19]	0	1	[20]					3	3	0	0	1	[23]				0	[23]				0	[23]	0	1	1	3	3	0	0	0	0	0	0	0	0	0	0	1	[35]
Goa	0	1						0	1	[20]					0	0	0	0	0	[23]				0	[23]				0	[23]	-2	0	0	2	0	0	0	2	0	0	2	2	2	0	0	0	[35]
West Bengal	2	2						0	1	[20]					0	0	0	0	0	[23]				0	[23]				0	[23]	-1	0	1	3	3	0	0	2	2	0	2	2	2	0	0	1	[35]
Jharkhand	0	1						0	1	[20]					0	0	0	0	0	[23]				0	[23]				0	[23]	-2	0	0	2	0	0	0	2	2	0	2	2	2	0	0	0	[35]
Karnataka	1	2						0	1	[20]					0	0	0	0	0	[23]				0	[23]				0	[23]	-2	0	0	3	3	0	0	2	0	0	2	2	2	0	0	1	[35]
Nagaland	5	2						0	1	[20]					2	0	0	2	0	[23]				0	[23]				1	[23]	0	1	1	3	3	0	0	0	2	0	2	2	2	0	0	1	[35]
Bihar	0	1						0	1	[20]					0	0	0	0	0	[23]				0	[23]				0	[23]	-2	0	0	2	0	0	0	2	2	0	2	2	2	0	0	0	[35]
Lakshadweep	-6	1						0	1	[20]					0	0	0	0	0	[23]				0	[23]				0	[23]	-2	0	0	0	0	0	0	0	0	0	0	0	0	0	0	0	[35]
Arunachal Pradesh	5	2						0	1	[20]					2	0	0	2	0	[23]				0	[23]				1	[23]	0	1	1	3	3	0	0	0	2	0	2	2	2	0	0	1	[35]
Gujarat	0	1						0	1	[20]					0	0	0	0	0	[23]				0	[23]				0	[23]	-2	0	0	2	0	0	0	2	0	0	2	2	2	0	0	0	[35]
Orissa	0	1						0	1	[20]					0	0	0	0	0	[23]				0	[23]				0	[23]	-2	0	0	2	0	0	0	2	2	0	2	2	2	0	0	0	[35]
Dadra and Nagar Haveli	0	1						0	1	[20]					0	0	0	0	0	[23]				0	[23]				0	[23]	-2	0	0	2	0	0	0	2	0	0	2	2	2	0	0	0	[35]
Uttar Pradesh	0	1						0	1	[20]					0	0	0	0	0	[23]				0	[23]				0	[23]	-2	0	0	2	0	0	0	2	0	0	2	2	2	0	0	0	[35]
Madhya Pradesh	0	1						0	1	[20]					0	0	0	0	0	[23]				0	[23]				0	[23]	-2	0	0	2	0	0	0	2	0	0	2	2	2	0	0	0	[35]
Rajasthan	0	1						0	1	[20]					0	0	0	0	0	[23]				0	[23]				0	[23]	-2	0	0	2	0	0	0	2	0	0	2	2	2	0	0	0	[35]
Tripura	5	2						0	1	[20]					2	0	0	2	0	[23]				0	[23]				1	[23]	0	1	1	3	3	0	0	0	2	0	2	2	2	0	0	1	[35]
Chandigarh	0	1						0	1	[20]					0	0	0	0	0	[23]				0	[23]				0	[23]	-2	0	0	2	0	0	0	2	0	0	0	0	2	0	0	0	[35]
Daman and Diu	0	1						0	1	[20]					0	0	0	0	0	[23]				0	[23]				0	[23]	-2	0	0	2	0	0	0	2	0	0	0	0	0	0	0	0	[35]
Tamil Nadu	1	2						0	1	[20]					0	0	0	0	0	[23]				0	[23]				0	[23]	-2	0	0	3	3	0	0	2	0	0	2	2	2	0	0	1	[35]
Kerala	1	2						0	1	[20]					0	0	0	0	0	[23]				0	[23]				0	[23]	-2	0	0	3	3	0	0	2	0	0	2	2	2	0	0	1	[35]
Maharashtra	0	1						0	1	[20]					0	0	0	0	0	[23]				0	[23]				0	[23]	-2	0	0	2	0	0	0	2	0	0	2	2	2	0	0	0	[35]
Punjab	0	1						0	1	[20]					0	0	0	0	0	[23]				0	[23]				0	[23]	-2	0	0	2	0	0	0	2	0	0	0	0	2	0	0	0	[35]
Sikkim	0	1						0	1	[20]					0	0	0	0	0	[23]				0	[23]				0	[23]	-2	0	0	2	0	0	0	0	0	0	2	2	2	0	0	0	[35]
Assam	5	2						0	1	[20]					2	0	0	2	0	[23]				0	[23]				1	[23]	0	1	1	3	3	0	0	0	2	0	2	2	2	0	0	1	[35]
Chhattisgarh	0	1						0	1	[20]					0	0	0	0	0	[23]				0	[23]				0	[23]	-2	0	0	2	0	0	0	2	0	0	2	2	2	0	0	0	[35]
Meghalaya	5	2						0	1	[20]					2	0	0	2	0	[23]				0	[23]				1	[23]	0	1	1	3	3	0	0	0	2	0	2	2	2	0	0	1	[35]
Delhi	0	1						0	1	[20]					0	0	0	0	0	[23]				0	[23]				0	[23]	-2	0	0	2	0	0	0	2	0	0	0	2	2	0	0	0	[35]
Sri Lanka
Central	0	1						0	1	[20]					0	0	0	0	0	[23]				0	[23]				0	[23]	-2	0	0	2	0	0	0	0	0	0	2	2	2	0	0	0	[35]
North Western	0	1						0	1	[20]					0	0	0	0	0	[23]				0	[23]				0	[23]	-2	0	0	2	0	0	0	0	0	0	2	2	2	0	0	0	[35]
Uva	0	1						0	1	[20]					0	0	0	0	0	[23]				0	[23]				0	[23]	-2	0	0	2	0	0	0	0	0	0	2	2	2	0	0	0	[35]
Sabaragamuwa	-3	1						-3	0	[20]					0	0	0	0	0	[23]				0	[23]				0	[23]	-2	0	0	2	0	0	0	0	0	0	2	2	2	0	0	0	[35]
Southern	0	1						0	1	[20]					0	0	0	0	0	[23]				0	[23]				0	[23]	-2	0	0	2	0	0	0	0	0	0	2	2	2	0	0	0	[35]
Eastern	0	1						0	1	[20]					0	0	0	0	0	[23]				0	[23]				0	[23]	-2	0	0	2	0	0	0	0	0	0	2	2	2	0	0	0	[35]
Western	-3	1						-3	0	[20]					0	0	0	0	0	[23]				0	[23]				0	[23]	-2	0	0	2	0	0	0	0	0	0	2	2	2	0	0	0	[35]
North Central	0	1						0	1	[20]					0	0	0	0	0	[23]				0	[23]				0	[23]	-2	0	0	2	0	0	0	0	0	0	2	2	2	0	0	0	[35]
Northern	0	1						0	1	[20]					0	0	0	0	0	[23]				0	[23]				0	[23]	-2	0	0	2	0	0	0	0	0	0	2	2	2	0	0	0	[35]
Papua New Guinea
Central	0	1						0	1	[20]					0	0	0	0	0	[23]				0	[23]				0	[23]	-2	0	0	2	0	0	0	0	0	2	0	0	0	0	0	0	[35]
East New Britain	0	1						0	1	[20]					0	0	0	0	0	[23]				0	[23]				0	[23]	-2	0	0	2	0	0	0	0	0	2	0	0	0	0	0	0	[35]
East Sepik	1	2						0	1	[20]					0	0	0	0	0	[23]				0	[23]				0	[23]	-1	0	1	2	0	0	0	0	0	2	0	0	0	0	0	0	[35]
Madang	0	1						0	1	[20]					0	0	0	0	0	[23]				0	[23]				0	[23]	-2	0	0	2	0	0	0	0	0	2	0	0	0	0	0	0	[35]
Simbu	0	1						0	1	[20]					0	0	0	0	0	[23]				0	[23]				0	[23]	-2	0	0	2	0	0	0	0	0	2	0	0	0	0	0	0	[35]
Morobe	0	1						0	1	[20]					0	0	0	0	0	[23]				0	[23]				0	[23]	-2	0	0	2	0	0	0	0	0	2	0	0	0	0	0	0	[35]
Western	1	2						0	1	[20]					0	0	0	0	0	[23]				0	[23]				0	[23]	-1	0	1	2	0	0	0	0	0	2	0	0	0	0	0	0	[35]
West New Britain	0	1						0	1	[20]					0	0	0	0	0	[23]				0	[23]				0	[23]	-2	0	0	2	0	0	0	0	0	2	0	0	0	0	0	0	[35]
Manus	-1	1						0	1	[20]					0	0	0	0	0	[23]				0	[23]				0	[23]	-2	0	0	1	0	0	0	0	0	0	0	0	0	0	1	0	[35]
Western Highlands	0	1						0	1	[20]					0	0	0	0	0	[23]				0	[23]				0	[23]	-2	0	0	2	0	0	0	0	0	2	0	0	0	0	0	0	[35]
Gulf	0	1						0	1	[20]					0	0	0	0	0	[23]				0	[23]				0	[23]	-2	0	0	2	0	0	0	0	0	2	0	0	0	0	0	0	[35]
North Solomons	-1	1						0	1	[20]					0	0	0	0	0	[23]				0	[23]				0	[23]	-2	0	0	1	0	0	0	0	0	0	0	0	0	0	1	0	[35]
New Ireland	0	1						0	1	[20]					0	0	0	0	0	[23]				0	[23]				0	[23]	-2	0	0	2	0	0	0	0	0	2	0	0	0	0	0	0	[35]
NCD	0	1						0	1	[20]					0	0	0	0	0	[23]				0	[23]				0	[23]	-2	0	0	2	0	0	0	0	0	2	0	0	0	0	0	0	[35]
West Sepik	1	2						0	1	[20]					0	0	0	0	0	[23]				0	[23]				0	[23]	-1	0	1	2	0	0	0	0	0	2	0	0	0	0	0	0	[35]
Oro	0	1						0	1	[20]					0	0	0	0	0	[23]				0	[23]				0	[23]	-2	0	0	2	0	0	0	0	0	2	0	0	0	0	0	0	[35]
Milne Bay	0	1						0	1	[20]					0	0	0	0	0	[23]				0	[23]				0	[23]	-2	0	0	2	0	0	0	0	0	2	0	0	0	0	0	0	[35]
Southern Highlands	0	1						0	1	[20]					0	0	0	0	0	[23]				0	[23]				0	[23]	-2	0	0	2	0	0	0	0	0	2	0	0	0	0	0	0	[35]
Eastern Highlands	0	1						0	1	[20]					0	0	0	0	0	[23]				0	[23]				0	[23]	-2	0	0	2	0	0	0	0	0	2	0	0	0	0	0	0	[35]
Enga	0	1						0	1	[20]					0	0	0	0	0	[23]				0	[23]				0	[23]	-2	0	0	2	0	0	0	0	0	2	0	0	0	0	0	0	[35]
China
Hebei Sheng	-1	1						0	1	[20]					0	0	0	0	0	[23]				0	[23]				0	[23]	-2	0	0	1	0	0	0	0	0	0	0	0	0	0	1	0	[35]
Anhui Sheng	-1	1						0	1	[20]					0	0	0	0	0	[23]				0	[23]				0	[23]	-2	0	0	1	0	0	0	0	0	0	0	0	0	0	1	0	[35]
Hainan Sheng	1	2						0	1	[20]					0	0	0	0	0	[23]				0	[23]				0	[23]	-2	0	0	3	3	0	0	0	2	0	2	0	0	0	0	1	[35]
Tianjin Shi	-1	1						0	1	[20]					0	0	0	0	0	[23]				0	[23]				0	[23]	-2	0	0	1	0	0	0	0	0	0	0	0	0	0	1	0	[35]
Qinghai Sheng	-4	1						-3	0	[20]					0	0	0	0	0	[23]				0	[23]				0	[23]	-2	0	0	1	0	0	0	0	0	0	0	0	0	0	1	0	[35]
Jilin Sheng	-4	1						-3	0	[20]					0	0	0	0	0	[23]				0	[23]				0	[23]	-2	0	0	1	0	0	0	0	0	0	0	0	0	0	1	0	[35]
Shanxi Sheng	-1	1						0	1	[20]					0	0	0	0	0	[23]				0	[23]				0	[23]	-2	0	0	1	0	0	0	0	0	0	0	0	0	0	1	0	[35]
Heilongjiang Sheng	-4	1						-3	0	[20]					0	0	0	0	0	[23]				0	[23]				0	[23]	-2	0	0	1	0	0	0	0	0	0	0	0	0	0	1	0	[35]
Guangxi Zhuangzu Zizhiqu	0	1						0	1	[20]					0	0	0	0	0	[23]				0	[23]				0	[23]	-2	0	0	2	0	0	0	0	2	0	2	2	0	0	0	0	[35]
Yunnan Sheng	5	2						0	1	[20]					2	0	0	2	0	[23]				0	[23]				1	[23]	0	1	1	3	3	0	0	0	2	0	2	2	2	0	0	1	[35]
Jiangxi Sheng	-1	1						0	1	[20]					0	0	0	0	0	[23]				0	[23]				0	[23]	-2	0	0	1	0	0	0	0	0	0	0	0	0	0	1	0	[35]
Llasa	-1	1						0	1	[20]					0	0	0	0	0	[23]				0	[23]				0	[23]	-2	0	0	1	0	0	0	0	0	0	0	0	0	0	1	0	[35]
Ngari	0	1						0	1	[20]					0	0	0	0	0	[23]				0	[23]				0	[23]	-2	0	0	2	0	0	0	2	0	0	0	0	0	0	0	0	[35]
Nagqu	-1	1						0	1	[20]					0	0	0	0	0	[23]				0	[23]				0	[23]	-2	0	0	1	0	0	0	0	0	0	0	0	0	0	1	0	[35]
Qamdo	1	2						0	1	[20]					0	0	0	0	0	[23]				0	[23]				0	[23]	-1	0	1	2	0	0	0	0	2	0	0	0	0	0	0	0	[35]
Shigatse	0	1						0	1	[20]					0	0	0	0	0	[23]				0	[23]				0	[23]	-2	0	0	2	0	0	0	0	0	0	2	2	0	0	0	0	[35]
Shannan	-1	1						0	1	[20]					0	0	0	0	0	[23]				0	[23]				0	[23]	-2	0	0	1	0	0	0	0	0	0	0	0	0	0	1	0	[35]
Nyingchi	4	2						0	1	[20]					2	0	0	2	0	[23]				0	[23]				1	[23]	0	1	1	2	0	0	0	0	2	0	0	0	0	0	0	0	[35]
Guangdong Sheng	3	2						0	1	[20]					1	1	0	0	0	[23]	1	2011	[33]	0	[23]				0	[23]	0	0	0	2	0	0	0	0	2	0	0	0	0	0	0	0	[35]
Fujian Sheng	-1	1						0	1	[20]					0	0	0	0	0	[23]				0	[23]				0	[23]	-2	0	0	1	0	0	0	0	0	0	0	0	0	0	1	0	[35]
Nei Mongol Zizhiqu	-4	1						-3	0	[20]					0	0	0	0	0	[23]				0	[23]				0	[23]	-2	0	0	1	0	0	0	0	0	0	0	0	0	0	1	0	[35]
Beijing Shi	-1	1						0	1	[20]					0	0	0	0	0	[23]				0	[23]				0	[23]	-2	0	0	1	0	0	0	0	0	0	0	0	0	0	1	0	[35]
Xinjiang Uygur Zizhiqu	-4	1						-3	0	[20]					0	0	0	0	0	[23]				0	[23]				0	[23]	-2	0	0	1	0	0	0	0	0	0	0	0	0	0	1	0	[35]
Jiangsu Sheng	-1	1						0	1	[20]					0	0	0	0	0	[23]				0	[23]				0	[23]	-2	0	0	1	0	0	0	0	0	0	0	0	0	0	1	0	[35]
Shanghai Shi	-1	1						0	1	[20]					0	0	0	0	0	[23]				0	[23]				0	[23]	-2	0	0	1	0	0	0	0	0	0	0	0	0	0	1	0	[35]
Shaanxi Sheng	-1	1						0	1	[20]					0	0	0	0	0	[23]				0	[23]				0	[23]	-2	0	0	1	0	0	0	0	0	0	0	0	0	0	1	0	[35]
Liaoning Sheng	-1	1						0	1	[20]					0	0	0	0	0	[23]				0	[23]				0	[23]	-2	0	0	1	0	0	0	0	0	0	0	0	0	0	1	0	[35]
Sichuan Sheng	0	1						0	1	[20]					0	0	0	0	0	[23]				0	[23]				0	[23]	-2	0	0	2	0	0	0	0	2	0	0	0	0	0	0	0	[35]
Guizhou Sheng	0	1						0	1	[20]					0	0	0	0	0	[23]				0	[23]				0	[23]	-2	0	0	2	0	0	0	0	2	0	2	0	0	0	0	0	[35]
Gansu Sheng	-1	1						0	1	[20]					0	0	0	0	0	[23]				0	[23]				0	[23]	-2	0	0	1	0	0	0	0	0	0	0	0	0	0	1	0	[35]
Chongqing Shi	0	1						0	1	[20]					0	0	0	0	0	[23]				0	[23]				0	[23]	-2	0	0	2	0	0	0	0	2	0	0	0	0	0	0	0	[35]
Shandong Sheng	-1	1						0	1	[20]					0	0	0	0	0	[23]				0	[23]				0	[23]	-2	0	0	1	0	0	0	0	0	0	0	0	0	0	1	0	[35]
Henan Sheng	-1	1						0	1	[20]					0	0	0	0	0	[23]				0	[23]				0	[23]	-2	0	0	1	0	0	0	0	0	0	0	0	0	0	1	0	[35]
Hubei Sheng	-1	1						0	1	[20]					0	0	0	0	0	[23]				0	[23]				0	[23]	-2	0	0	1	0	0	0	0	0	0	0	0	0	0	1	0	[35]
Zhejiang Sheng	-1	1						0	1	[20]					0	0	0	0	0	[23]				0	[23]				0	[23]	-2	0	0	1	0	0	0	0	0	0	0	0	0	0	1	0	[35]
Ningxia Huizu Zizhiqu	-1	1						0	1	[20]					0	0	0	0	0	[23]				0	[23]				0	[23]	-2	0	0	1	0	0	0	0	0	0	0	0	0	0	1	0	[35]
Hunan Sheng	0	1						0	1	[20]					0	0	0	0	0	[23]				0	[23]				0	[23]	-2	0	0	2	0	0	0	0	2	0	0	0	0	0	0	0	[35]
Palau	-1	1													3	3	0	0	0	[23]	3	2011	[34]	0	[23]				0	[23]	0	1	1	0	0	0	0	0	0	0	0	0	0	0	0	0	[35]
Bhutan
Paro	-4	1						-3	0	[20]					0	0	0	0	0	[23]				0	[23]				0	[23]	-2	0	0	1	0	0	0	0	0	0	0	0	0	0	1	0	[35]
Bumthang	0	1						0	1	[20]					0	0	0	0	0	[23]				0	[23]				0	[23]	-2	0	0	2	0	0	0	0	2	0	0	0	0	0	1	0	[35]
Zhemgang	1	2						0	1	[20]					0	0	0	0	0	[23]				0	[23]				0	[23]	-1	0	1	2	0	0	0	0	2	0	2	2	2	0	1	0	[35]
Sarpang	2	2						0	1	[20]					0	0	0	0	0	[23]				0	[23]				0	[23]	-1	0	1	3	3	0	0	0	2	0	2	2	2	0	1	1	[35]
Samdrup-Jonkha	1	2						0	1	[20]					0	0	0	0	0	[23]				0	[23]				0	[23]	-1	0	1	2	0	0	0	0	2	0	2	2	2	0	1	0	[35]
Wangdue-Phodrang	0	1						0	1	[20]					0	0	0	0	0	[23]				0	[23]				0	[23]	-2	0	0	2	0	0	0	0	0	0	2	2	0	0	1	0	[35]
Lhuentse	-3	1						-3	0	[20]					0	0	0	0	0	[23]				0	[23]				0	[23]	-2	0	0	2	0	0	0	0	2	0	0	0	0	0	1	0	[35]
Chhukha	2	2						0	1	[20]					0	0	0	0	0	[23]				0	[23]				0	[23]	-1	0	1	3	3	0	0	0	2	0	2	2	2	0	1	1	[35]
Mongar	1	2						0	1	[20]					0	0	0	0	0	[23]				0	[23]				0	[23]	-1	0	1	2	0	0	0	0	2	0	2	2	0	0	1	0	[35]
Trongsa	-3	1						-3	0	[20]					0	0	0	0	0	[23]				0	[23]				0	[23]	-2	0	0	2	0	0	0	0	2	0	2	2	0	0	1	0	[35]
Dagana	2	2						0	1	[20]					0	0	0	0	0	[23]				0	[23]				0	[23]	-1	0	1	3	3	0	0	0	2	0	2	2	2	0	1	1	[35]
Punakha	-1	1						0	1	[20]					0	0	0	0	0	[23]				0	[23]				0	[23]	-2	0	0	1	0	0	0	0	0	0	0	0	0	0	1	0	[35]
Pemagatshel	1	2						0	1	[20]					0	0	0	0	0	[23]				0	[23]				0	[23]	-1	0	1	2	0	0	0	0	2	0	2	2	2	0	1	0	[35]
Samtse	0	1						0	1	[20]					0	0	0	0	0	[23]				0	[23]				0	[23]	-2	0	0	2	0	0	0	0	0	0	2	2	2	0	1	0	[35]
Trashigang	1	2						0	1	[20]					0	0	0	0	0	[23]				0	[23]				0	[23]	-1	0	1	2	0	0	0	0	2	0	2	2	0	0	1	0	[35]
Gasa	-4	1						-3	0	[20]					0	0	0	0	0	[23]				0	[23]				0	[23]	-2	0	0	1	0	0	0	0	0	0	0	0	0	0	1	0	[35]
Trashi Yangtse	0	1						0	1	[20]					0	0	0	0	0	[23]				0	[23]				0	[23]	-2	0	0	2	0	0	0	0	2	0	0	0	0	0	1	0	[35]
Thimphu	-1	1						0	1	[20]					0	0	0	0	0	[23]				0	[23]				0	[23]	-2	0	0	1	0	0	0	0	0	0	0	0	0	0	1	0	[35]
Tsirang	2	2						0	1	[20]					0	0	0	0	0	[23]				0	[23]				0	[23]	-1	0	1	3	3	0	0	0	2	0	2	2	2	0	1	1	[35]
Ha	-3	1						-3	0	[20]					0	0	0	0	0	[23]				0	[23]				0	[23]	-2	0	0	2	0	0	0	0	0	0	2	2	0	0	1	0	[35]
References
1. Khim N, Siv S, Kim S, Mueller T, Fleischmann E, et al. (2011) Plasmodium knowlesi infection in humans, Cambodia, 2007-2010. Emerging Infectious Diseases 17: 1900-1902.
2. Jongwutiwes S, Buppan P, Kosuvin R, Seethamchai S, Pattanawong U, et al. (2011) Plasmodium knowlesi malaria in humans and macaques, Thailand. Emerg Infect Dis 17: 1799-1806.
3. Berry A, Iriart X, Wilhelm N, Valentin A, Cassaing S, et al. (2011) Imported Plasmodium knowlesi malaria in a French tourist returning from Thailand. Am J Trop Med Hyg 84: 535-538.
4. Jongwutiwes S, Putaporntip C, Iwasaki T, Sata T, Kanbara H (2004) Naturally acquired Plasmodium knowlesi malaria in human, Thailand. Emerg Infect Dis 10: 2211.
5. Jiang N, Chang Q, Sun X, Lu H, Yin J, et al. (2010) Co-infections with Plasmodium knowlesi and other malaria parasites, Myanmar. Emerging Infectious Diseases 16: 1476-1478.
6. Sermwittayawong N, Singh B, Nishibuchi M, Sawangjaroen N, Vuddhakul V (2012) Human Plasmodium knowlesi infection in Ranong province, southwestern border of Thailand. Malaria Journal 11: 36.
7. Van den Eede P, Van HN, Van Overmeir C, Vythilingam I, Duc TN, et al. (2009) Human Plasmodium knowlesi infections in young children in central Vietnam. Malar J 8: 249.
8. Marchand RP, Culleton R, Maeno Y, Quang NT, Nakazawa S (2011) Co-infections of Plasmodium knowlesi, P. falciparum, and P. vivax among humans and Anopheles dirus mosquitoes, Southern Vietnam. Emerg Infect Dis 17: 1232-1239.
9. Vythilingam I, Noorazian YM, Huat TC, Jiram AI, Yusri YM, et al. (2008) Plasmodium knowlesi in humans, macaques and mosquitoes in peninsular Malaysia. Parasit Vectors 1: 26.
10. Link L, Bart A, Verhaar N, van Gool T, Pronk M, et al. (2012) Molecular detection of Plasmodium knowlesi in a Dutch traveler by real-time PCR. J Clin Microbiol 50: 2523-2524.
11. Lau YL, Tan LH, Chin LC, Fong MY, Noraishah MA-A, et al. (2011) Plasmodium knowlesi reinfection in human. Emerg Infect Dis 17: 1314.
12. Joveen-Neoh WF, Chong KL, Wong CM, Lau TY (2011) Incidence of malaria in the interior division of Sabah, Malaysian Borneo, based on nested PCR. J Parasitol Res 2011: 104284.
13. Singh B, Daneshvar C (2010) Plasmodium knowlesi malaria in Malaysia. Medical Journal of Malaysia 65: 223-230.
14. Barber BE, William T, Dhararaj P, Anderios F, Grigg MJ, et al. (2012) Epidemiology of Plasmodium knowlesi malaria in north-east Sabah, Malaysia: family clusters and wide age distribution. Malar J 11: 401.
15. Ennis JG, Teal AE, Habura A, Madison-Antenucci S, Keithly JS, et al. (2009) Simian malaria in a U.S. traveler - New York, 2008. Morbidity and Mortality Weekly Report 58: 229-232.
16. Figtree M, Lee R, Bain L, Kennedy T, Mackertich S, et al. (2010) Plasmodium knowlesi in human, Indonesian Borneo. Emerging Infectious Diseases 16: 672-674.
17. Jones-Engel L, Engel GA, Schillaci MA, Pacheco M, Escalante A (2007) Malarial monkeys: reservoir for zoonotic infection? American Journal of Primatology 69: 40-41.
18. Jeslyn WP, Huat TC, Vernon L, Irene LM, Sung LK, et al. (2011) Molecular epidemiological investigation of Plasmodium knowlesi in humans and macaques in Singapore. Vector Borne Zoonotic Dis 11: 131-135.
19. Tyagi RK, Das MK, Singh SS, Sharma YD (2013) Discordance in drug resistance-associated mutation patterns in marker genes of Plasmodium falciparum and Plasmodium knowlesi during coinfections. Journal of Antimicrobial Chemotherapy 68: 1081-1088.
20. WHO (2012) World Malaria Report 2012. Geneva: World Health Organization. 195 p.
21. Gething PW, Patil AP, Smith DL, Guerra CA, Elyazar IRF, et al. (2011) A new world malaria map: Plasmodium falciparum endemicity in 2010. Malar J 10.
22. Gething PW, Elyazar IRF, Moyes CL, Smith DL, Battle KE, et al. (2012) A long neglected world malaria map: Plasmodium vivax endemicity in 2010. Plos Neglected Tropical Diseases 6: e1814.
23. The IUCN Red List of Threatened Species.
24. Malaivijitnond S, Vazquez Y, Hamada Y (2011) Human impact on long-tailed macaques in Thailand. In: Gumert MD, Fuentes A, Jones-Engel L, editors. Monkeys on the Edge: Ecology and Management of Long-Tailed Macaques and the Interface with Humans. United Kingdon: Cambridge University Press. pp. 118-159.
25. Nor S (1996) The mammalian fauna on the islands at the northern tip of Sabah, Borneo. Fieldana Zoology 83: 1-51.
26. Karimullah, Anuar S (2012) The dominant species of monkeys (Macaca fascicularis) in northern region of peninsular Malaysia. Pakistan Journal of Zoology 44: 1567-1574.
27. Turner C, Tamblyn A, Dray R, Maunder L, Gibson C, et al. (2003) Malaysia reefs and islands conservation project 2003, report of the terrestrial pilot phase. Department of Fisheries, Government of Malaysia
Coral Cay Conservation. 1-52 p.
28. Unpublished data (2013) Wildlife Resources Division, Department of the Environment and Natural Resources, the Philippines
29. Kemp NJ, Burnett JB (2003) Final report: A biodiversity risk assessment and recommendations for risk management of long-tailed macaques (Macaca fascicularis) in New Guinea. Indo-Pacific Conservation Alliance. 1-116 p.
30. Jones-Engel L, Engel GA, Schillact MA, Froehlich J, Paputungan U, et al. (2004) Prevalence of enteric parasites in pet macaques in Sulawesi, Indonesia. Am J Primatol 62: 71-82.
31. Nijman V (2001) Forest (and) Primates: Conservation and ecology of the endemic primates of Java and Borneo.
32. UNESCO, Committee IMaBPN (2012) Periodic review on Komodo biosphere reserve, Indonesia. Indonesian Man and Biosphere Programme National Committee. 1-73 p.
33. Gumert MD (2011) The common monkey of Southeast Asia: Long-tailed macaque populations, ethnophoresy, and their occurrence in human environments. In: Gumert MD, Fuentes A, Jones-Engel L, editors. Monkeys on the Edge: Ecology and Management of Long-Tailed Macaques and their Interface with Humans. United Kingdom: Cambridge University Press. pp. 3-44.
34. Wheatley BP (2011) Ethnophoresy: the exotic macaques of Ngeaur Island: Republic of Palau; Gumert MD, Fuentes A, Jones-Engel L, editors. 252-272 p.
35. Sinka ME, Bangs MJ, Manguin S, Chareonviriyaphap T, Patil AP, et al. (2011) The dominant Anopheles vectors of human malaria in the Asia-Pacific region: occurrence data, distribution maps and bionomic precis. Parasit Vectors 4.
36. Sulaeman DS, Sigit SH, Koesharto FX, Hindayana D (2004) [A study on the community and population of Anopheles mosquitoes in relation to malaria epidemiology in Bolapapu]. Institut Pertanian Bogor. 1-96 p.
37. Tarore D (2010) The utilization of natural enemies in controlling the habitat of Anopheles spp. (malaria disease vector) in its carious proliferation habitats in North Minahasa District. Jurnal Lasallian 7: 254-263.
38. Wardana A (2010) Studi perilaku menggigit nyamuk Anopheles balabacensis dan kaitannya dengan epidemiologi malaria di desa Lembah Sari kecamatan batulayar kabupaten Lombok Barat: Institut Pertanian Bogor. 16 p.
39. Maekawa Y, Tsuda Y, Dachlan YP, Yotoranoto S, Gerudug IK, et al. (2009) Anopheline fauna and incriminatory malaria vectors in malaria endemic areas on Lombok Island, Indonesia. Medical Entomology and Zoology 60: 1-11.
40. Maekawa Y, Sunahara T, Dachlan YP, Yotoranoto S, Basuki S, et al. (2009) First record of Anopheles balabacensis from Western Sumbawa Island, Indonesia. Journal of the American Mosquito Control Association 25: 203-205.
41. Sudomo M, Arianti Y, Wahid I, Safruddin D, Pedersen EM, et al. (2010) Towards eradication: three years after the tsunami of 2004, has malaria transmission been eliminated from the island of Simeulue? Trans R Soc Trop Med Hyg 104: 777-781.
42. Torres EP, Foley DH, Bryan JH (2006) Molecular systematics of the Philippine malaria vector Anopheles flavirostris. Med Vet Entomol 20: 44-52.
43. Mulyadi, Hadi UK, Sigit SH, Sukowati S (2010) [A spatial distribution, the breeding place characteristics of Anopheles species and the relation with malaria transmission in Doro Village, South Halmahera, North Maluku Province]. Institut Pertanian Bogor. 1-10 p.
[truncated: 44 more columns]

## Sheet: Singapore
Central Singapore	SG.CS	1	Ang Mo Kio-Cheng San, Central Singapore, Tanjong Pagar			Philippines		islands
North East	SG.NE	2	Hougang, North East
North West	SG.NW	3	Sembawang-Hong Kah
South East	SG.SE	4	Marine Parade, Potong Pasir
South West	SG.SW	5	Bukit Timah, Sembawang-Hong Kah, Tanjong Pagar
